# Supplementary material for: Ru(ii)–N-heterocyclic carbene complexes: synthesis, characterization, transfer hydrogenation reactions and biological determination
Source: PubMed Central journal article supplement — RSC Adv. 2019 Oct 25;9(59):34406–20. doi: 10.1039/c9ra05605j (PMC9074002; doi:10.1039/c9ra05605j), 2019-10-25
Supplement: RA-009-C9RA05605J-s001.pdf [file RA-009-C9RA05605J-s001.pdf]

## Supplementary Material 2

### Ru (II)-N-Heterocyclic Carbene Complexes: Synthesis, Characterization, Transfer Hydrogenation Reactions and Biological determination

Lamia Boubakri <sup>a</sup>, A. Chakchouk-Mtibaa<sup>b</sup>, L. Mansour<sup>c</sup>, L. Mellouli<sup>b</sup>, I. Özdemir<sup>d</sup>, S. Yasar<sup>d</sup> and Naceur Hamdi<sup>a,c</sup>

#### 1,3-Bis-(3,5-dimethylbenzyl)-5,6-dimethylbenzimidazolium bromide, **1a**

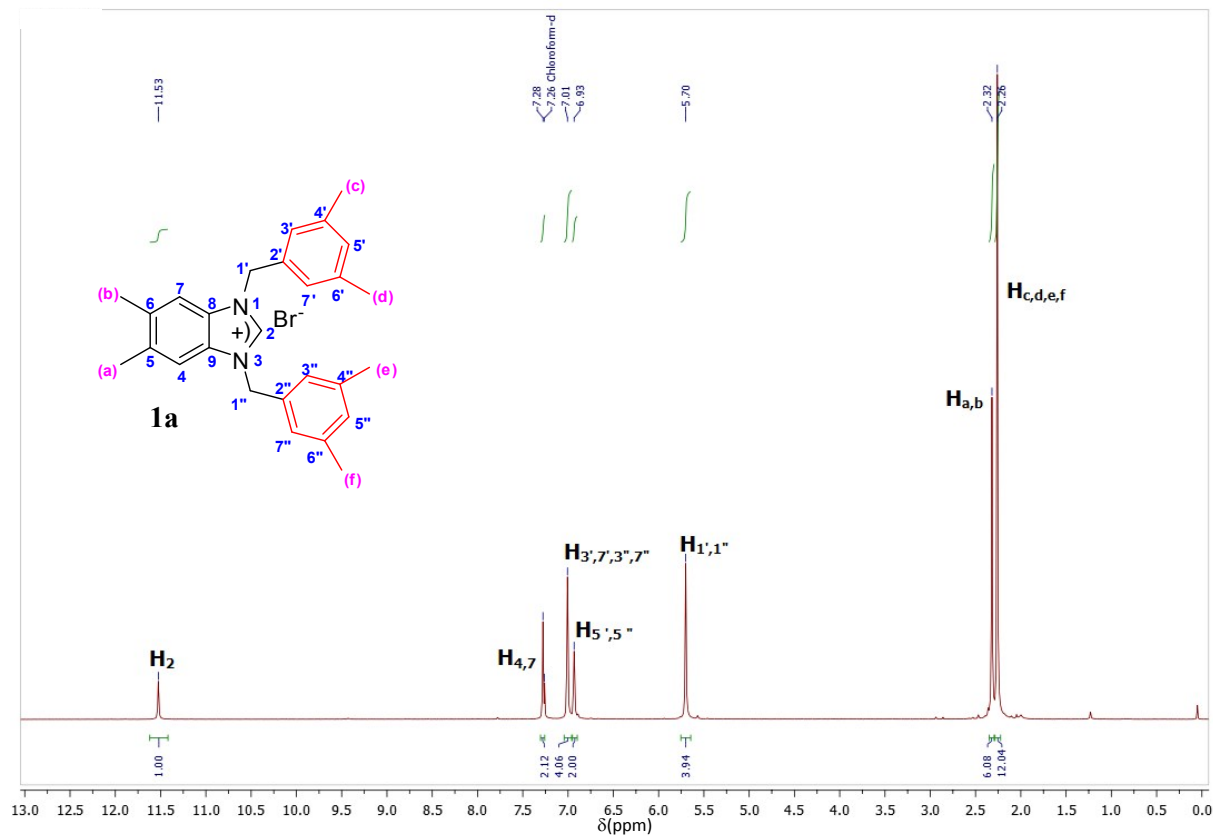

Figure S1: <sup>1</sup>H NMR spectra of benzimidazolium salt **1a** (CDCl<sub>3</sub>, 300MHz).

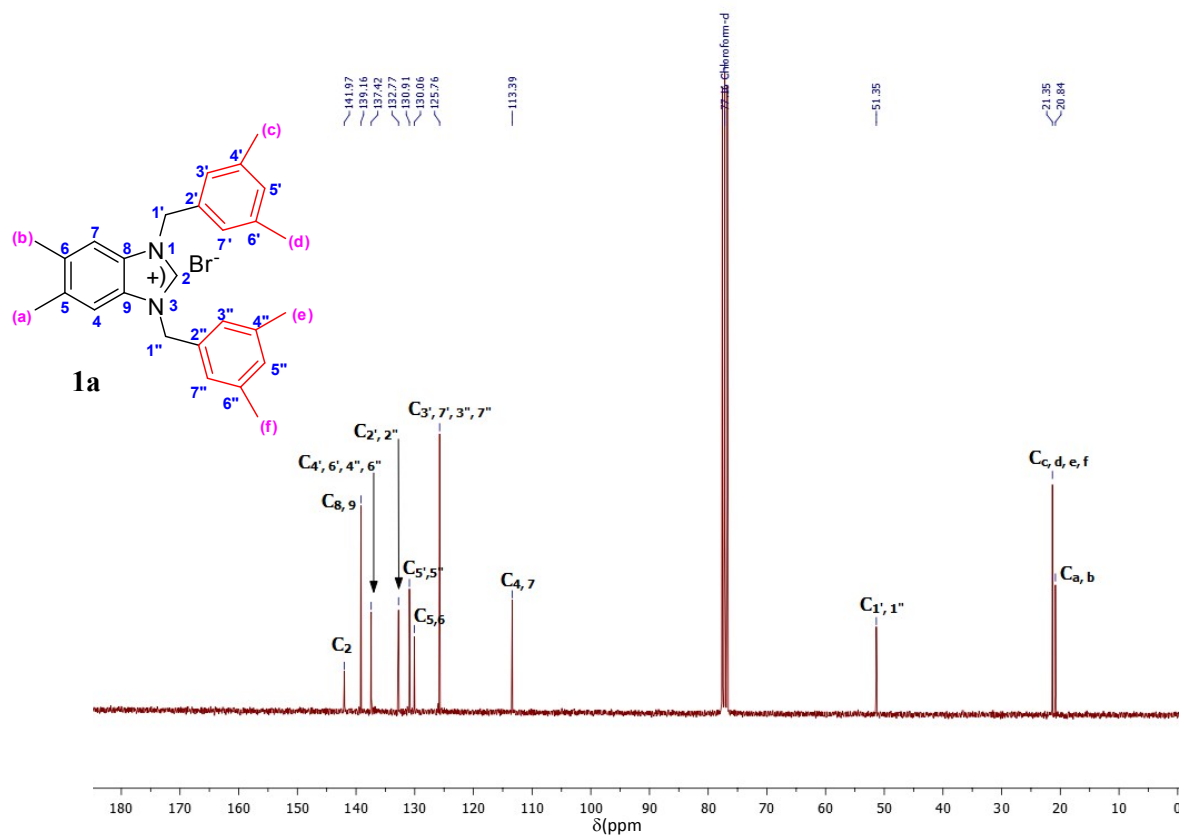

Figure S2: <sup>13</sup>CNMR spectra of benzimidazolium salt **1a** (CDCl<sub>3</sub>, 75MHz).

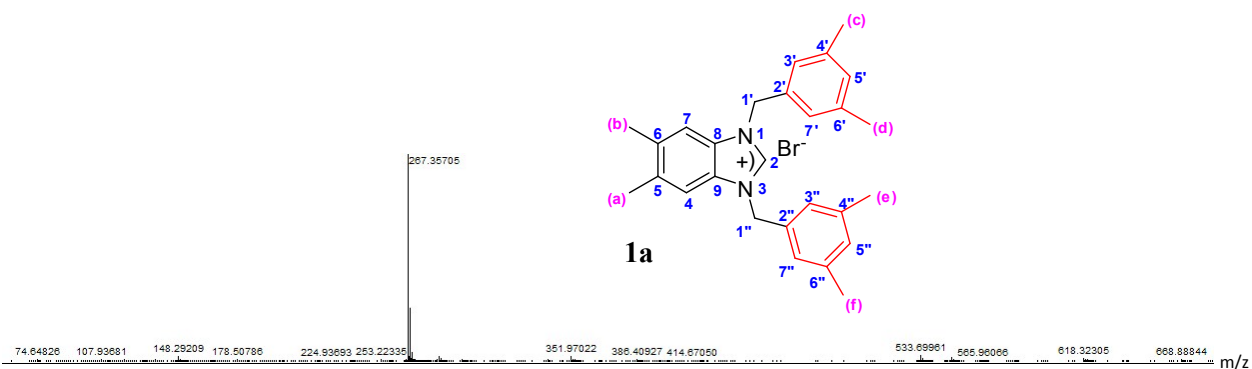

Figure S3: DART-TOF-MS of benzimidazolium salt **1a**.

**1, 3-Bis (4-methylbenzyl)-5,6-dimethyl benzimidazoliumbromide, 1b**

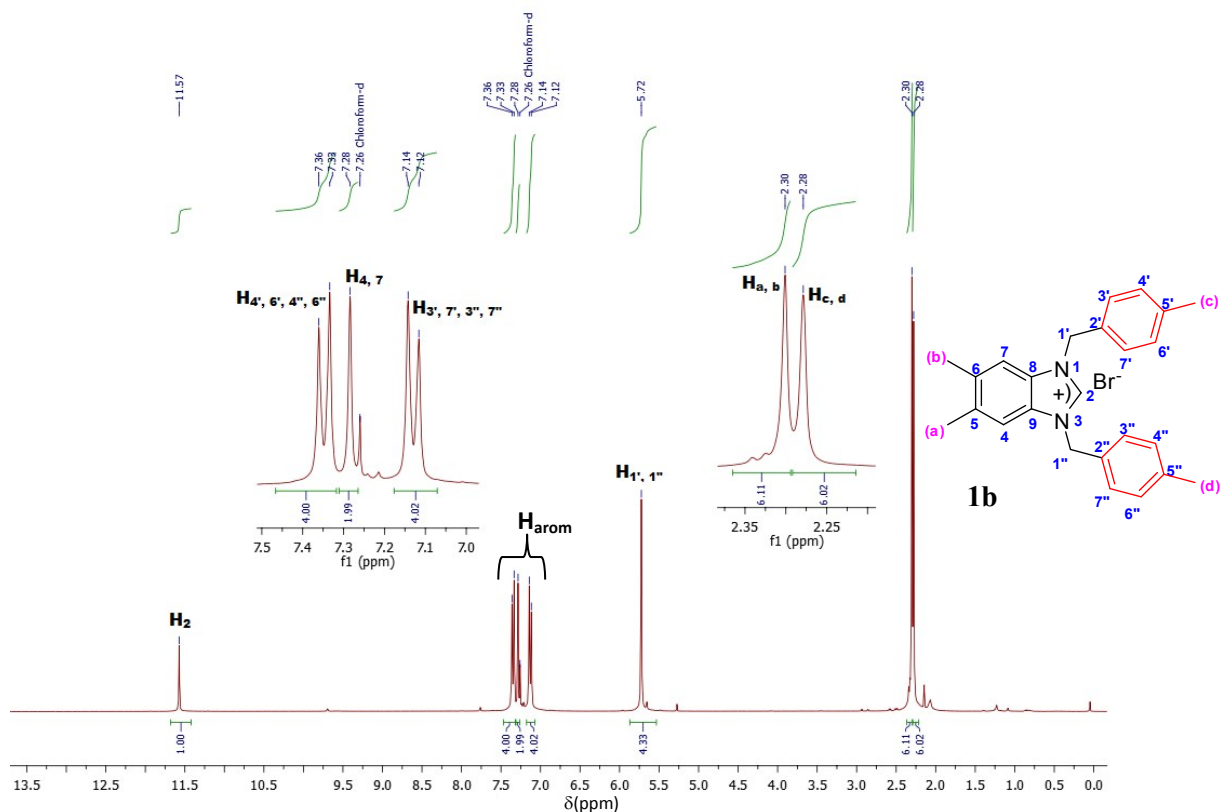

Figure S4:  $^1\text{H}$ NMR spectra of benzimidazolium salt **1b** ( $\text{CDCl}_3$ , 300MHz).

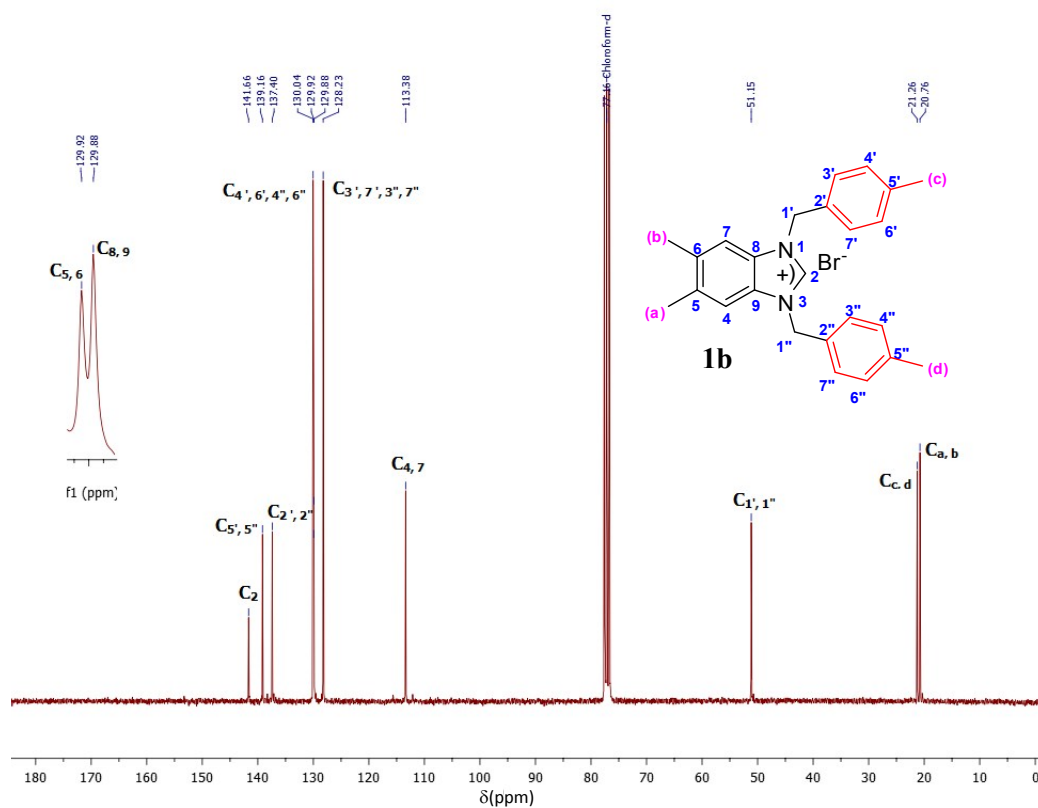

Figure S5:  $^{13}\text{C}$ NMR spectra of benzimidazolium salt **1b** ( $\text{CDCl}_3$ , 75MHz).

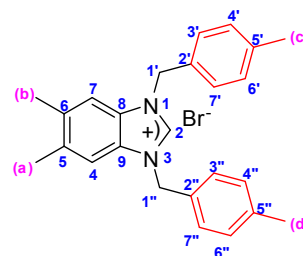

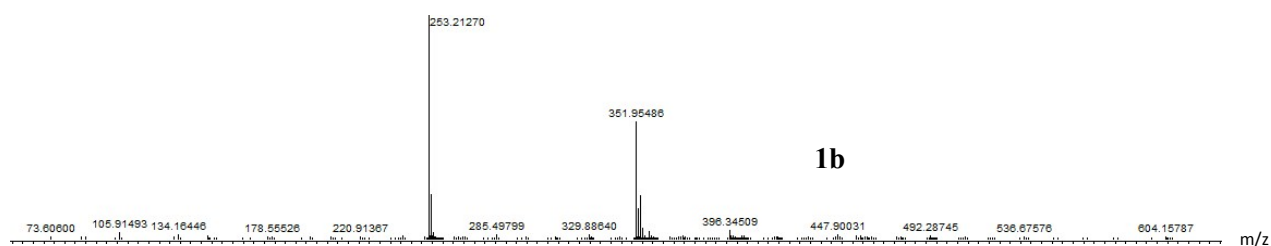

Figure S6: DART-TOF-MS of benzimidazolium salt **1b**.

**1, 3-Bis (4-tet-butylbenzyl) - 5,6-dimethyl benzimidazolium bromide, 1c**

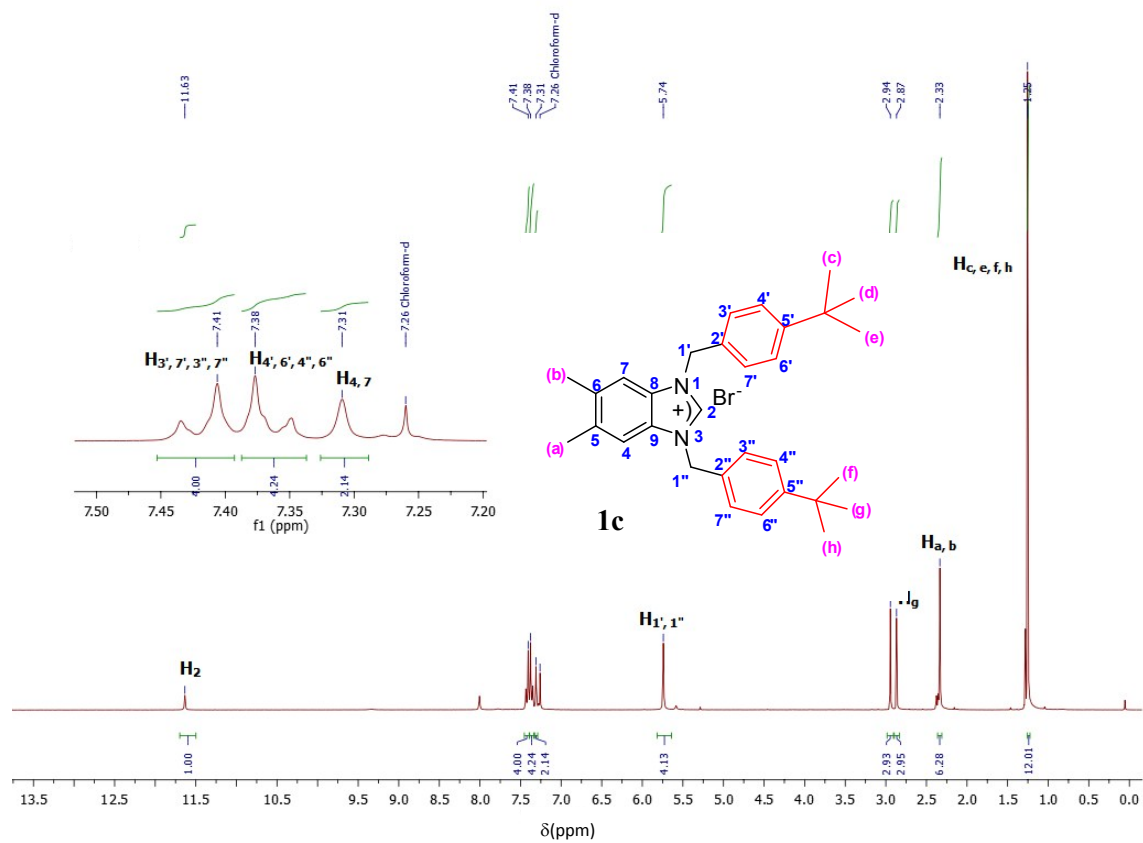

Figure S7:  $^1\text{H}$ NMR spectra of benzimidazolium salt **1c** ( $\text{CDCl}_3$ , 300MHz).

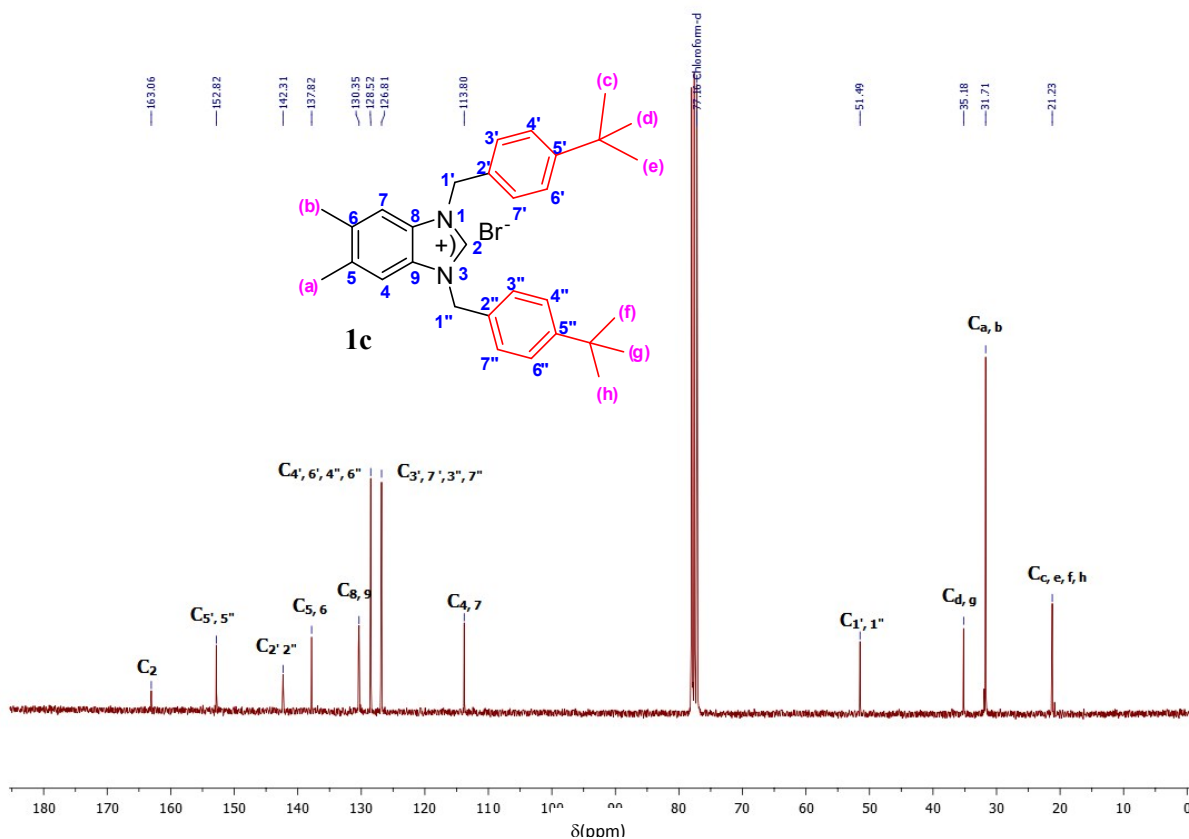

Figure S8:  $^{13}\text{C}$ NMR spectra of benzimidazolium salt **1c** ( $\text{CDCl}_3$ , 75MHz).

**1-(3,5-dimethylbenzyl)-3-(2,3,5,6-tetramethylbenzyl)-5,6-dimethylbenzimidazolium chloride, 1d**

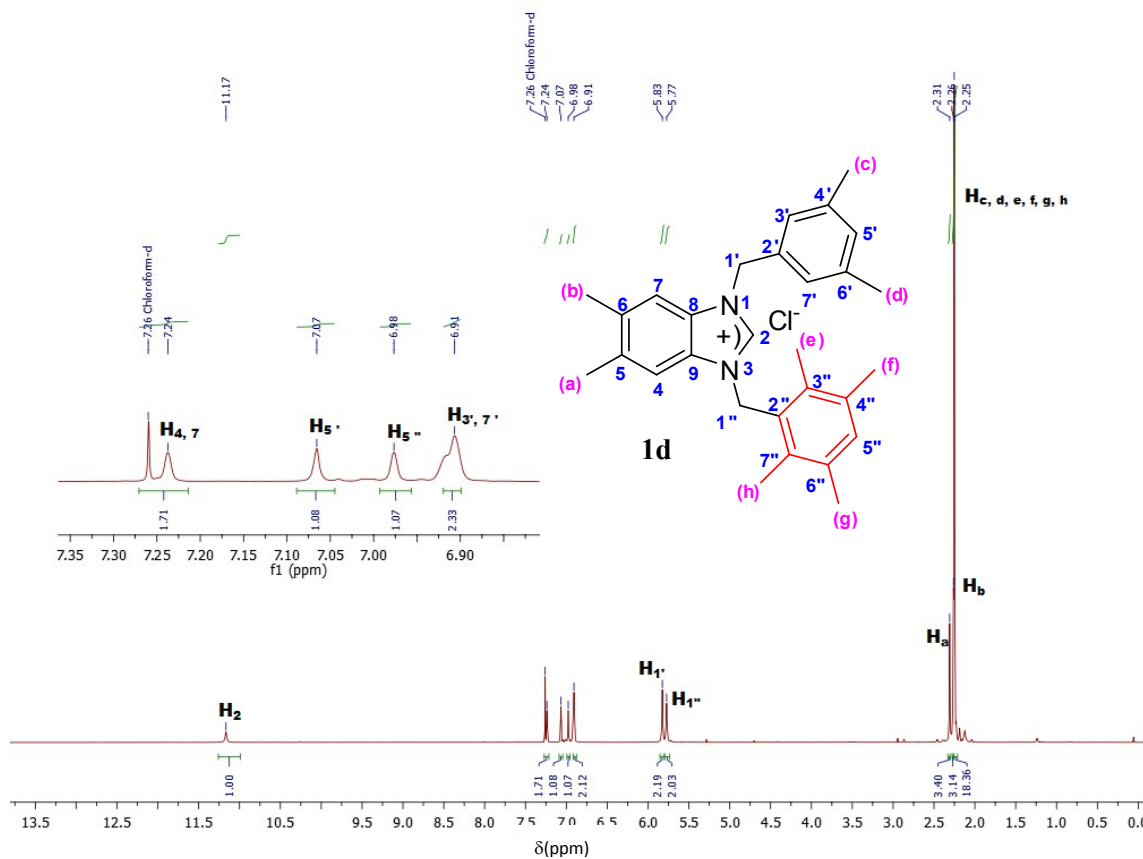

Figure S9:  $^1\text{H}$ NMR spectra of benzimidazolium salt **1d** ( $\text{CDCl}_3$ , 300MHz).

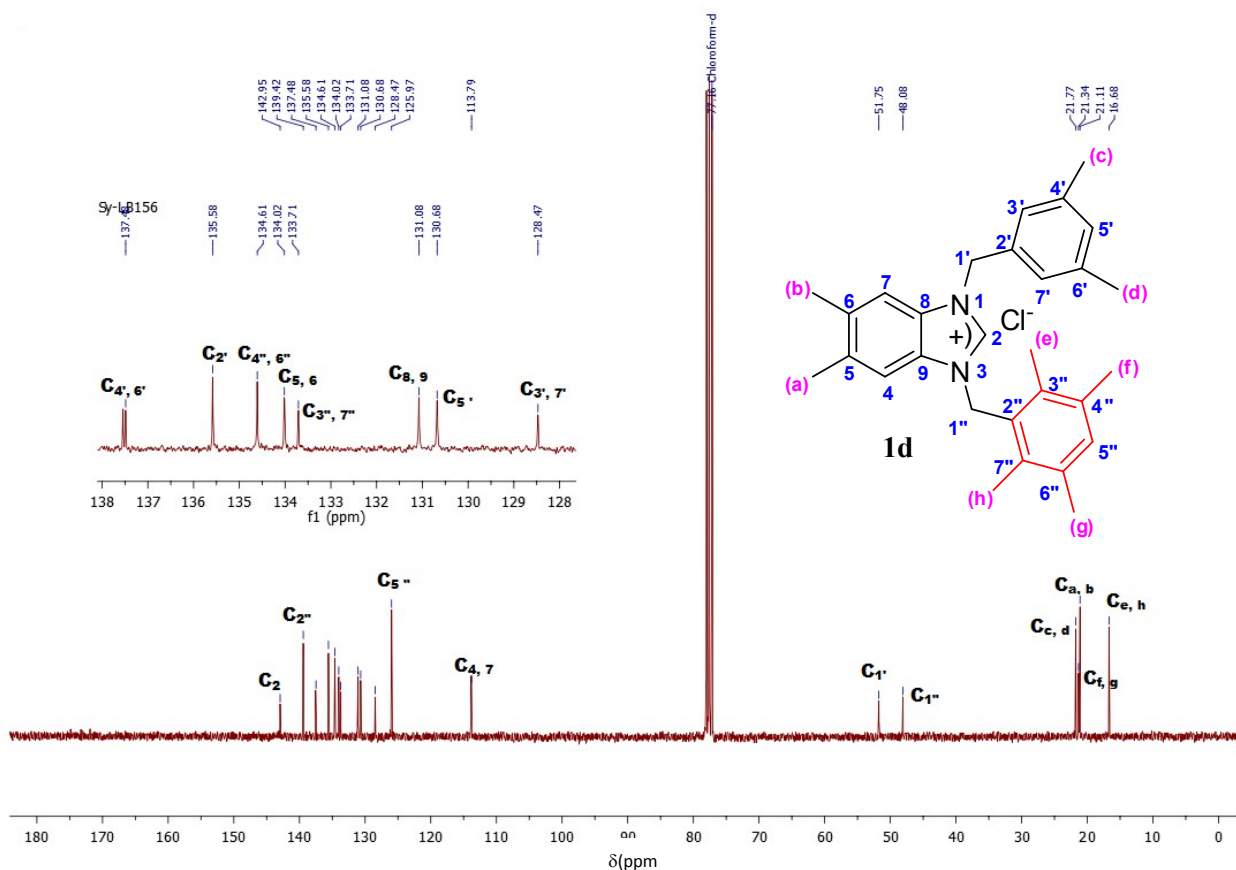

**1-(3,5-dimethylbenzyl)-3-(4-*tert*-butylbenzyl)-5,6-dimethylbenzimidazolium bromide, 1e**

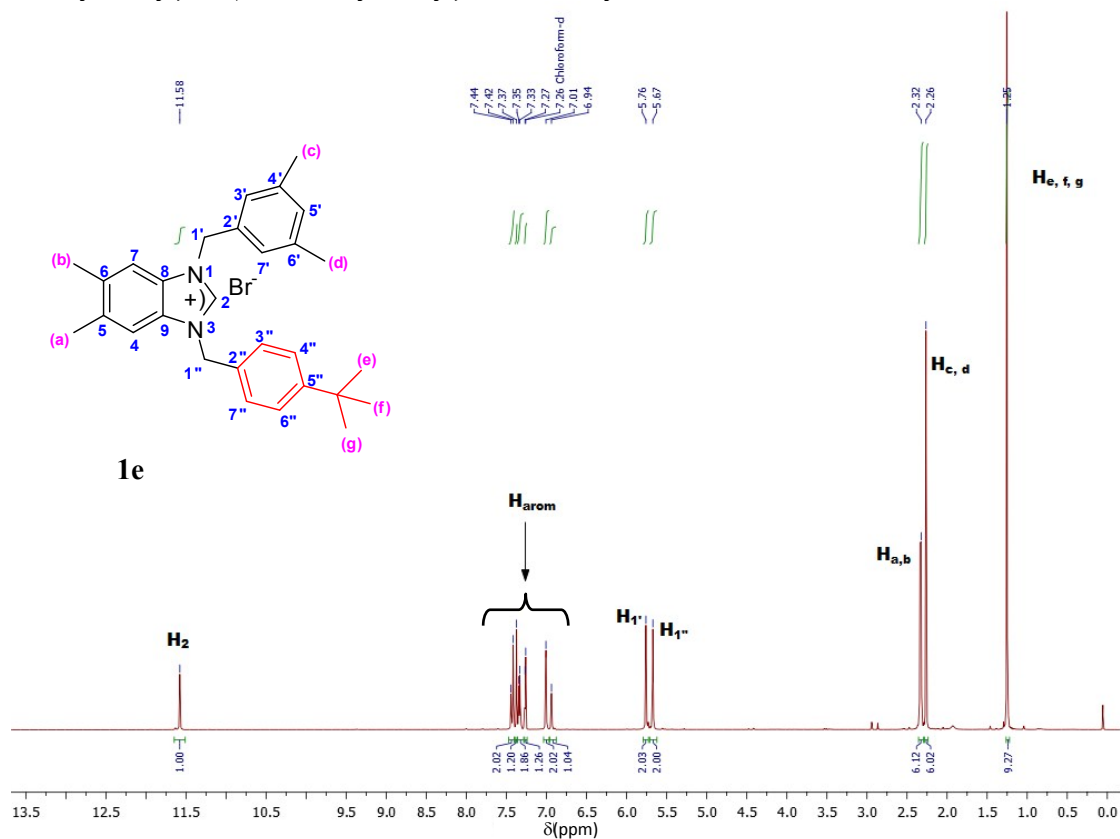

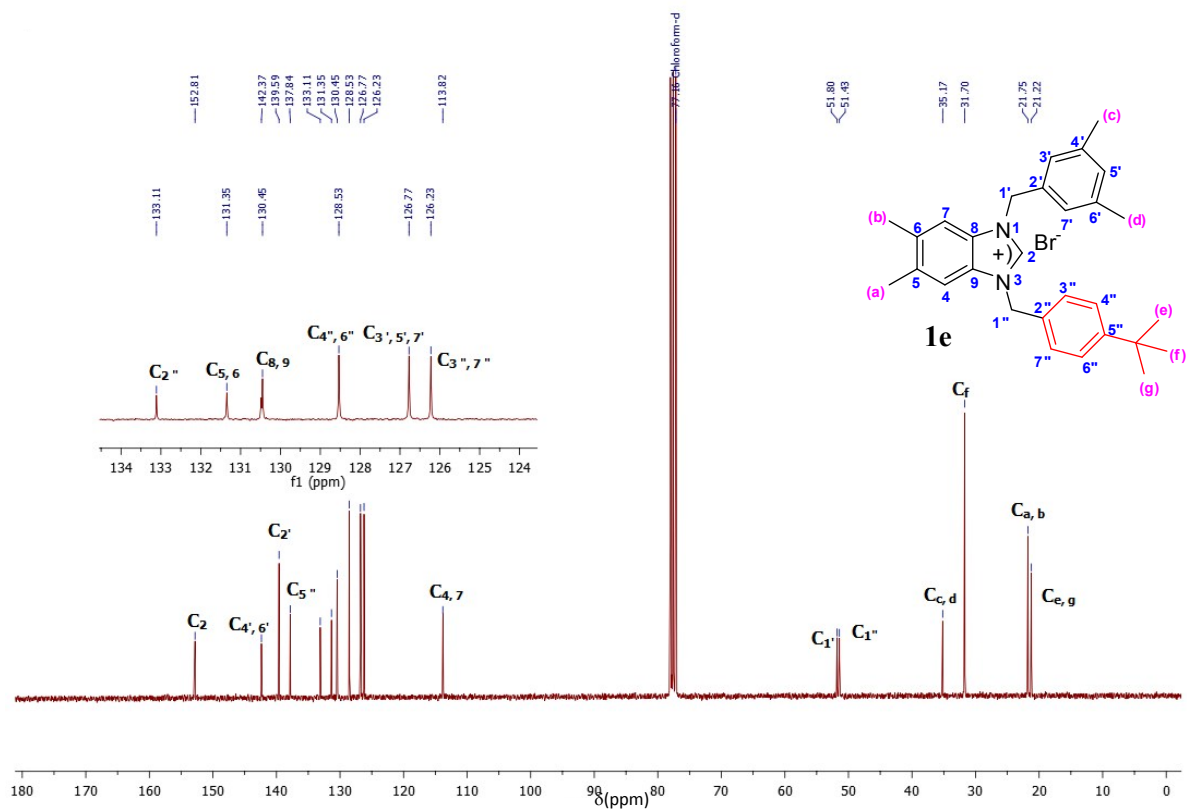

Figure S12:  $^{13}\text{C}$ NMR spectra of benzimidazolium salt **1e** ( $\text{CDCl}_3$ , 75MHz).

**1-(3,5-dimethylbenzyl)-3-(4-methylbenzyl)-5,6-dimethyl benzimidazolium bromide, 1f**

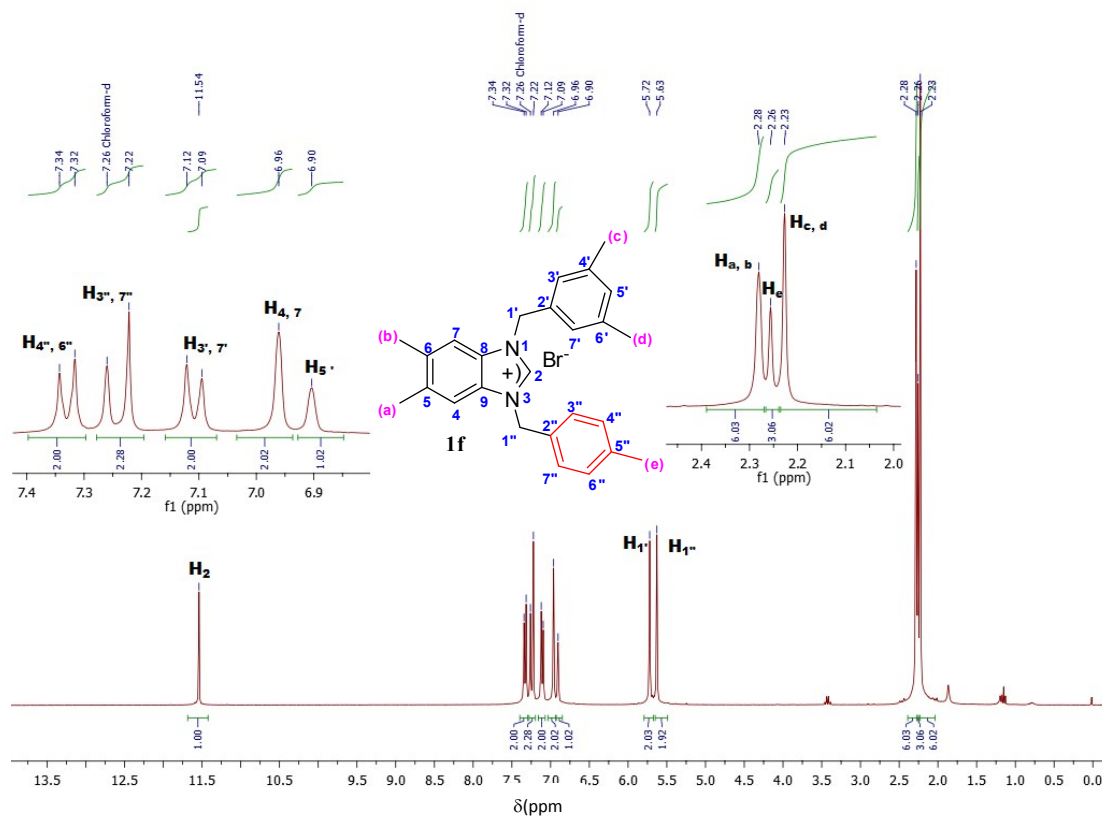

Figure S13:  $^1\text{H}$ NMR spectra of benzimidazolium salt **1f** ( $\text{CDCl}_3$ , 300MHz).

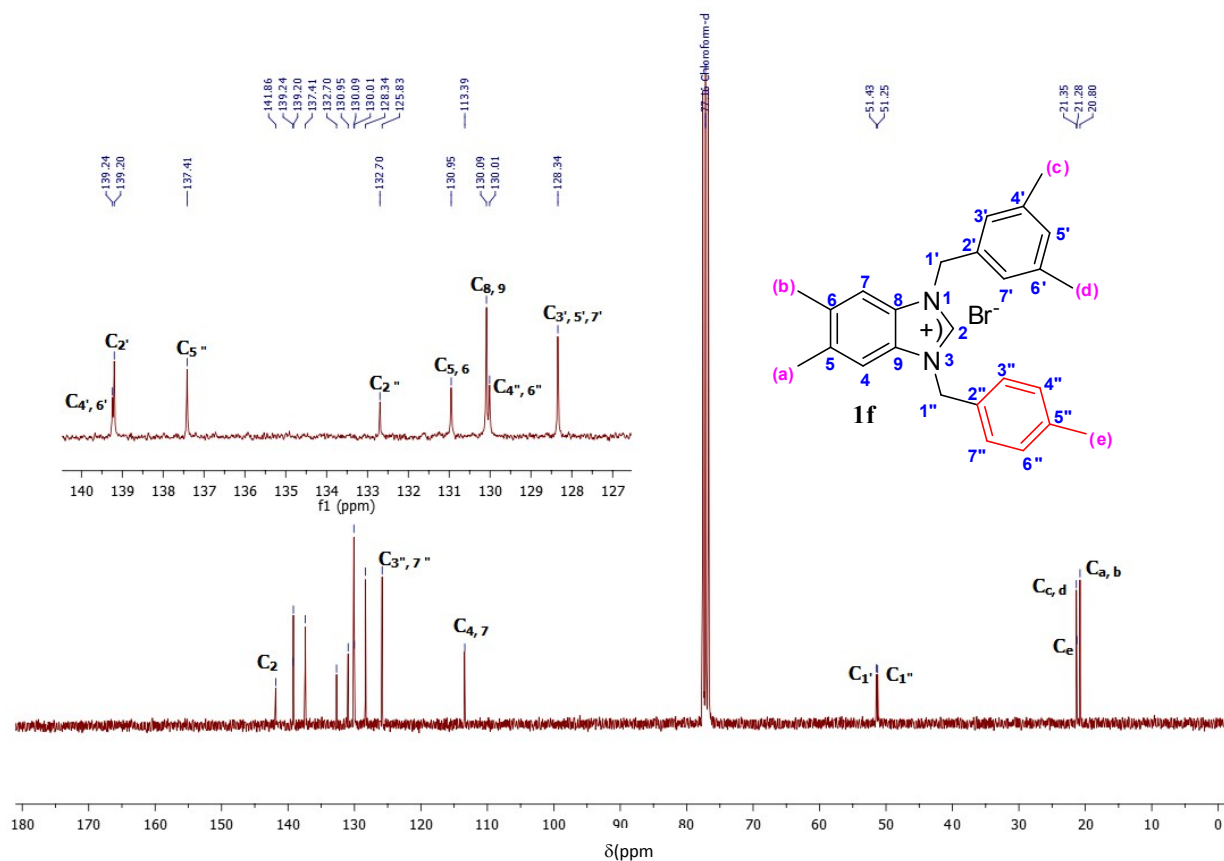

Figure S14:  $^{13}\text{C}$ NMR spectra of benzimidazolium salt **1f** ( $\text{CDCl}_3$ , 75MHz).

**Bromo-[1,3-Bis (3,5-dimethylbenzyl) benzimidazole-2-ylidene] silver (I), 2a**

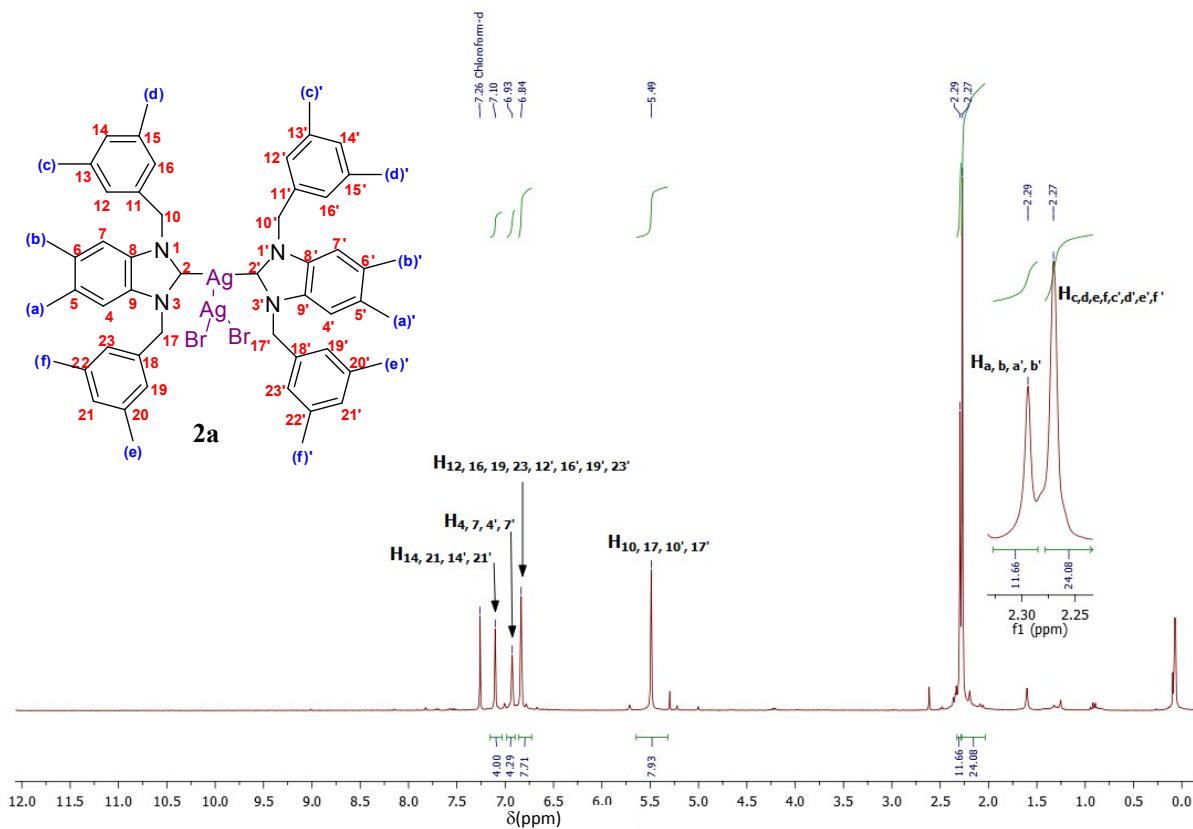



Figure S15:  $^1\text{H}$ NMR spectra of Ag(I)-N-Heterocyclic Carbene complexes **2a**( $\text{CDCl}_3$ , 300MHz).

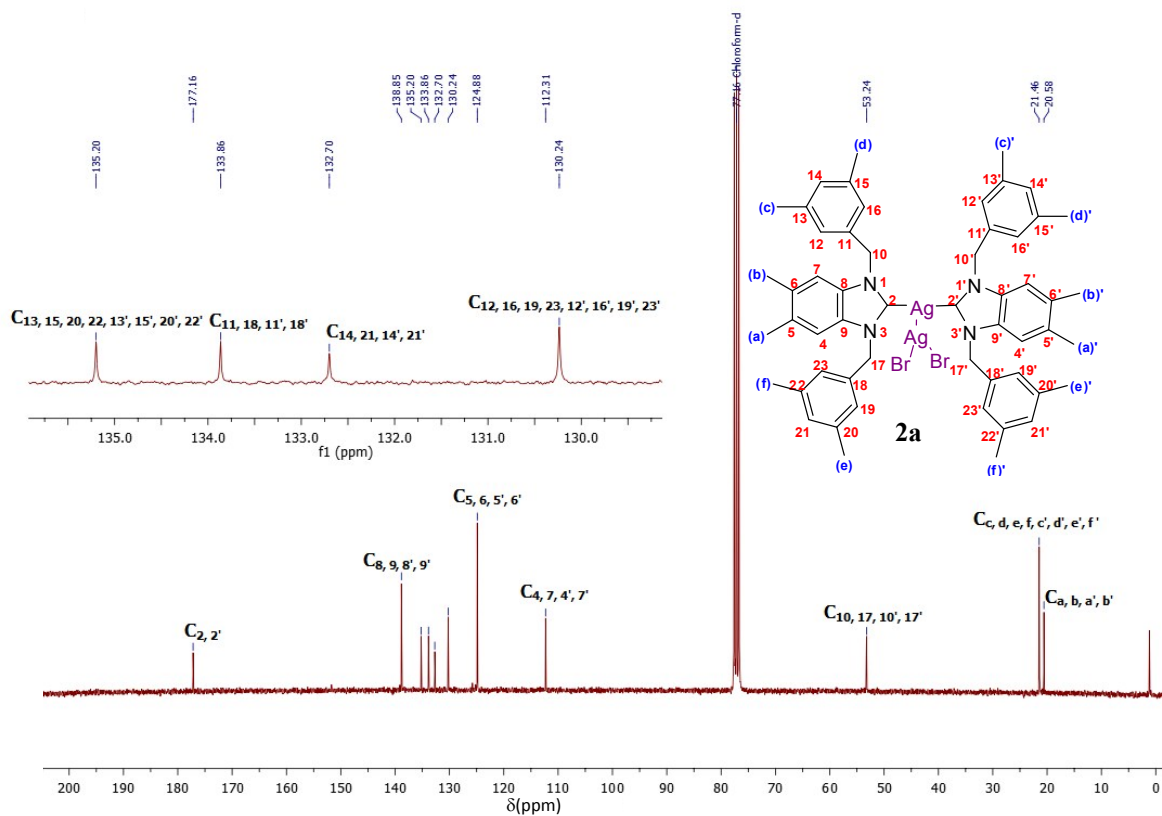

Figure S16:  $^{13}\text{C}$ NMR spectra of Ag(I)-N-Heterocyclic Carbene complexes **2a**( $\text{CDCl}_3$ , 75MHz).

***Bromo-[1,3-Bis (4-methylbenzyl) benzimidazole-2-ylidene] silver (I), 2b***

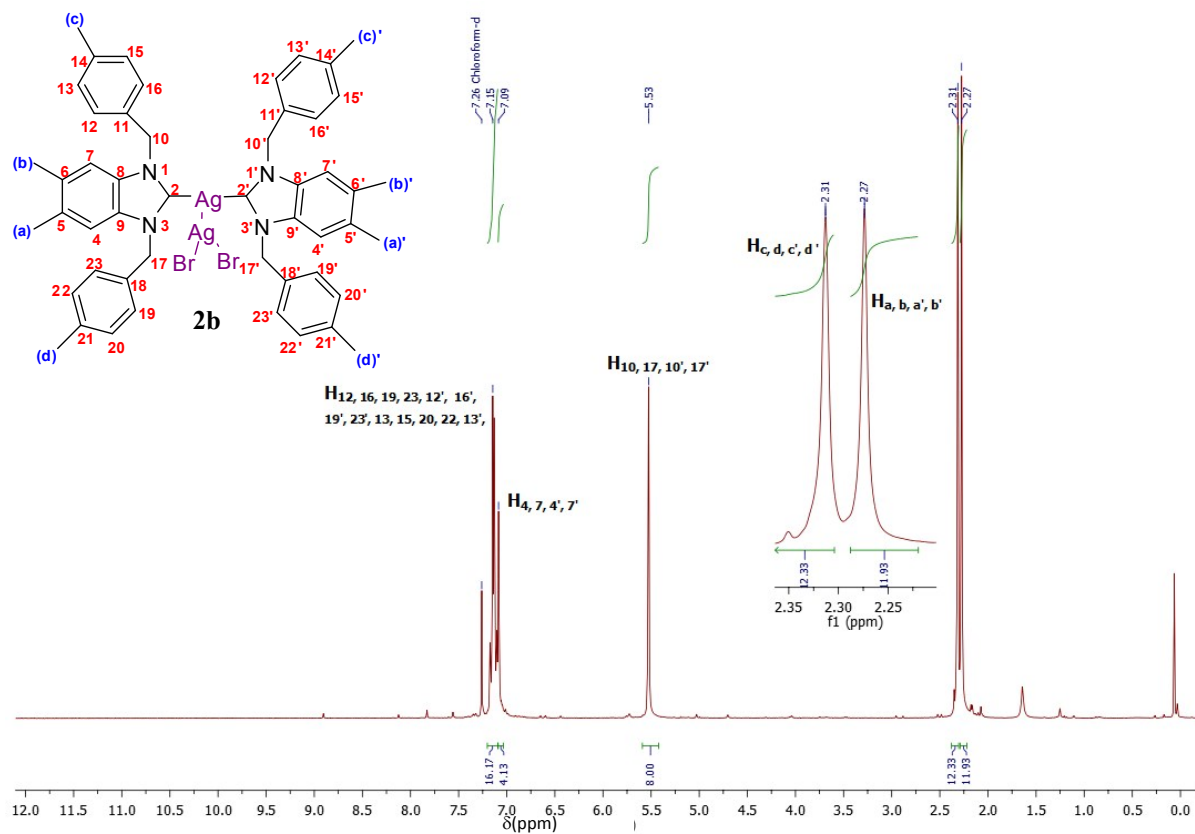

Figure S17:  $^1\text{H}$ NMR spectra of Ag(I)-N-Heterocyclic Carbene complexes **2b** ( $\text{CDCl}_3$ , 300MHz).

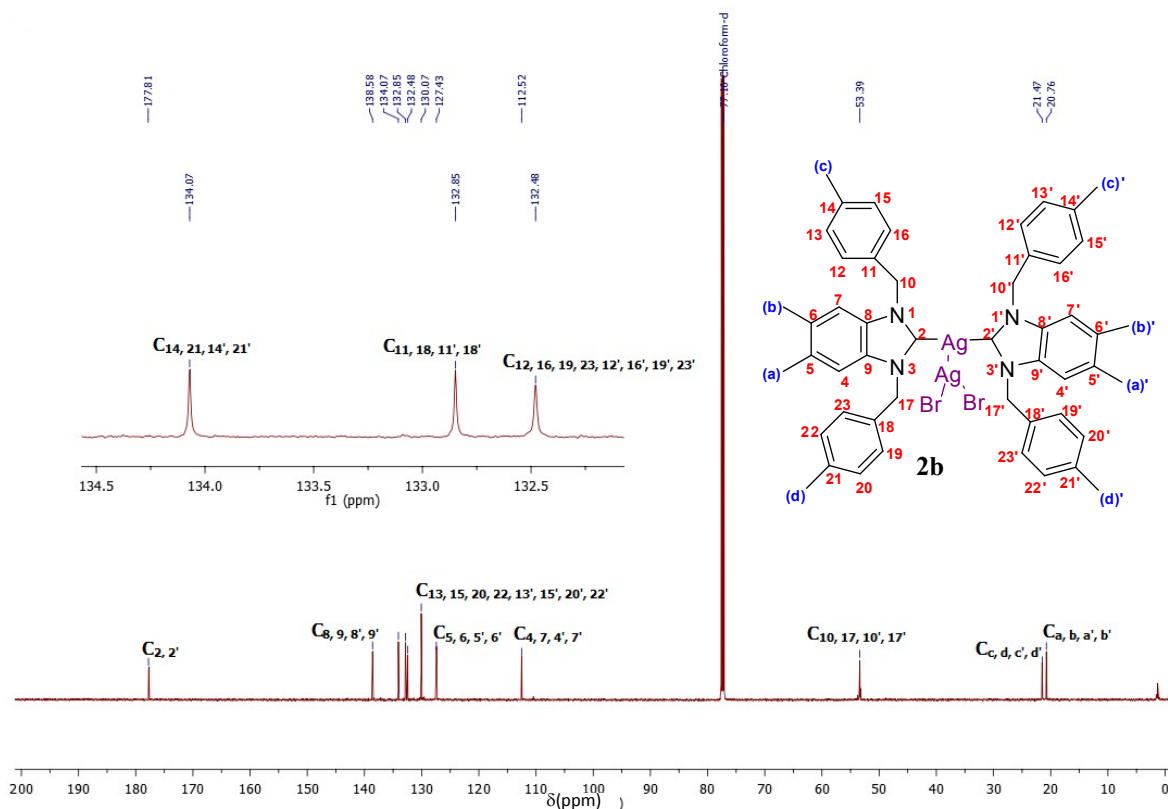

Figure S18:  $^{13}\text{C}$ NMR spectra of Ag(I)-N-Heterocyclic Carbene complexes **2b** ( $\text{CDCl}_3$ , 75MHz).

**Bromo-[1, 3- Bis-(4-tert-butylbenzyl) benzimidazole-2-ylidene] silver (I), 2c**

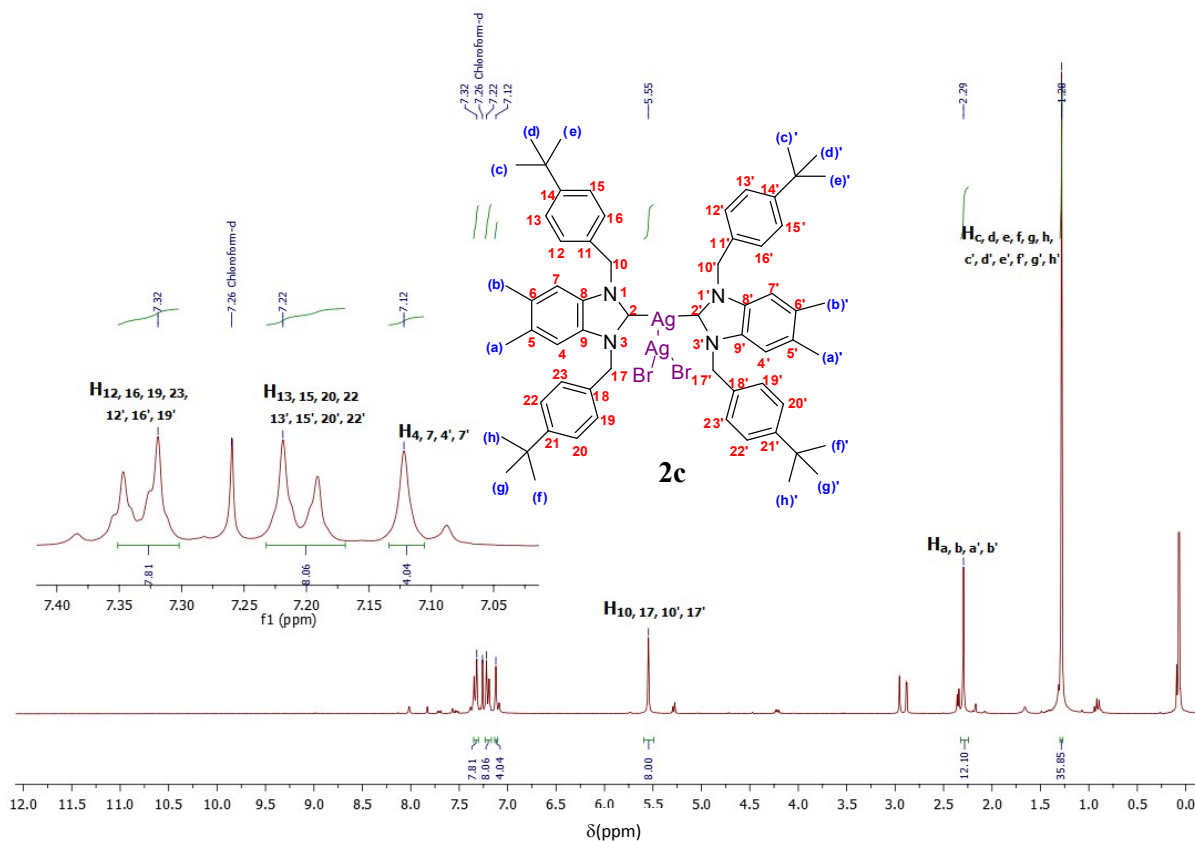

Figure S19:  $^1\text{H}$ NMR spectra of Ag(I)-N-Heterocyclic Carbene complexes **2c** ( $\text{CDCl}_3$ , 300MHz).

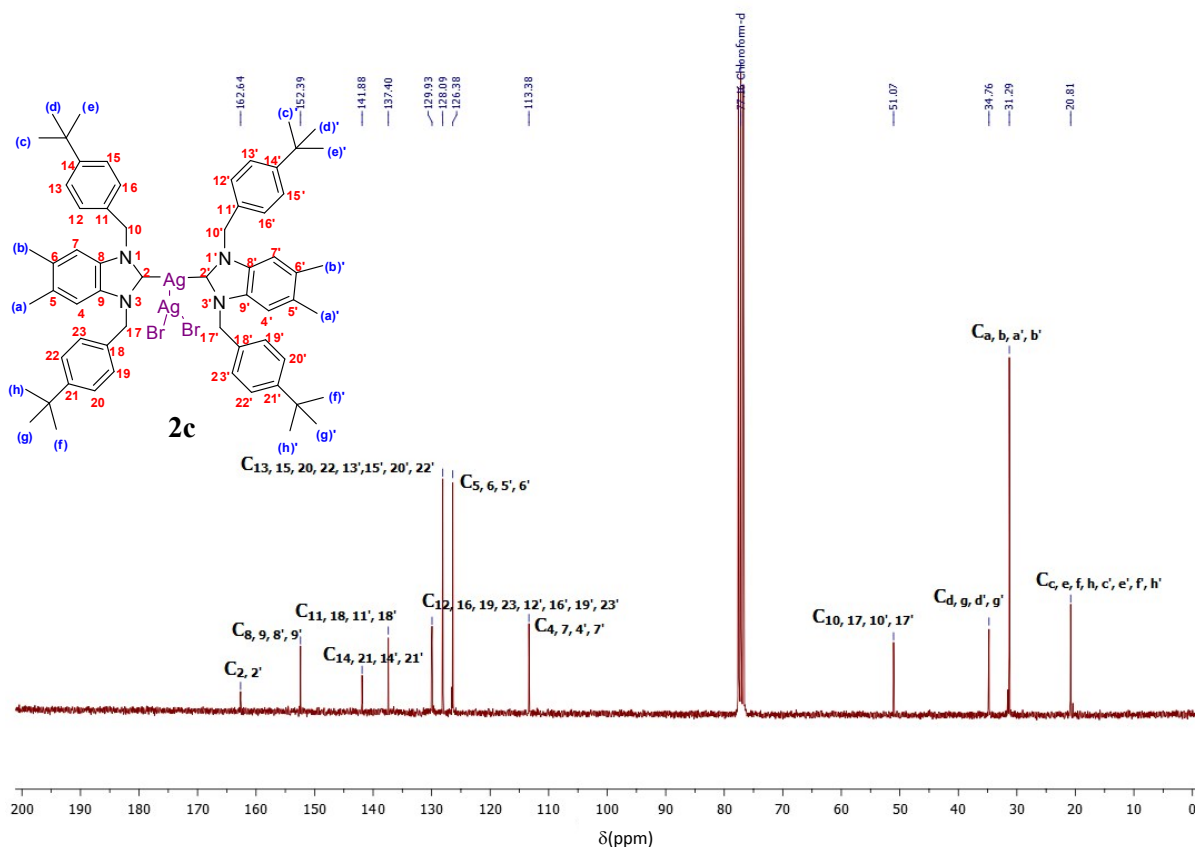

Figure S20:  $^{13}\text{C}$ NMR spectra of Ag(I)-N-Heterocyclic Carbene complexes **2c** ( $\text{CDCl}_3$ , 75MHz).

**Chloro-[1-(3,5-dimethylbenzyl)-3-(2,3,5,6-tetramethylbenzyl) benzimidazole-2-ylidene] silver (I), 2d**

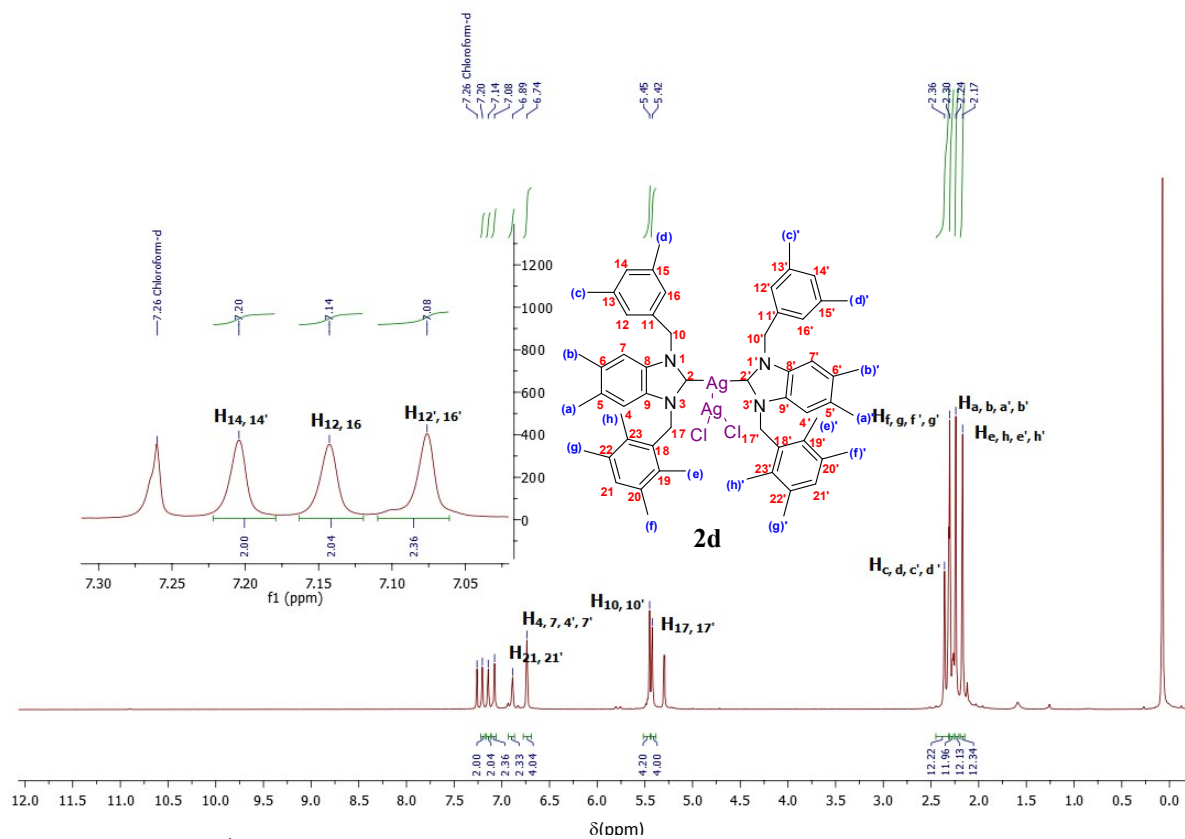

Figure S21: <sup>1</sup>H NMR spectra of Ag(I)-N-Heterocyclic Carbene complexes **2d** (CDCl<sub>3</sub>, 300MHz).

**Bromo-[1-(3,5-dimethylbenzyl)-3-(4-tert-butylbenzyl) benzimidazole-2-ylidene] silver (I), 2e**

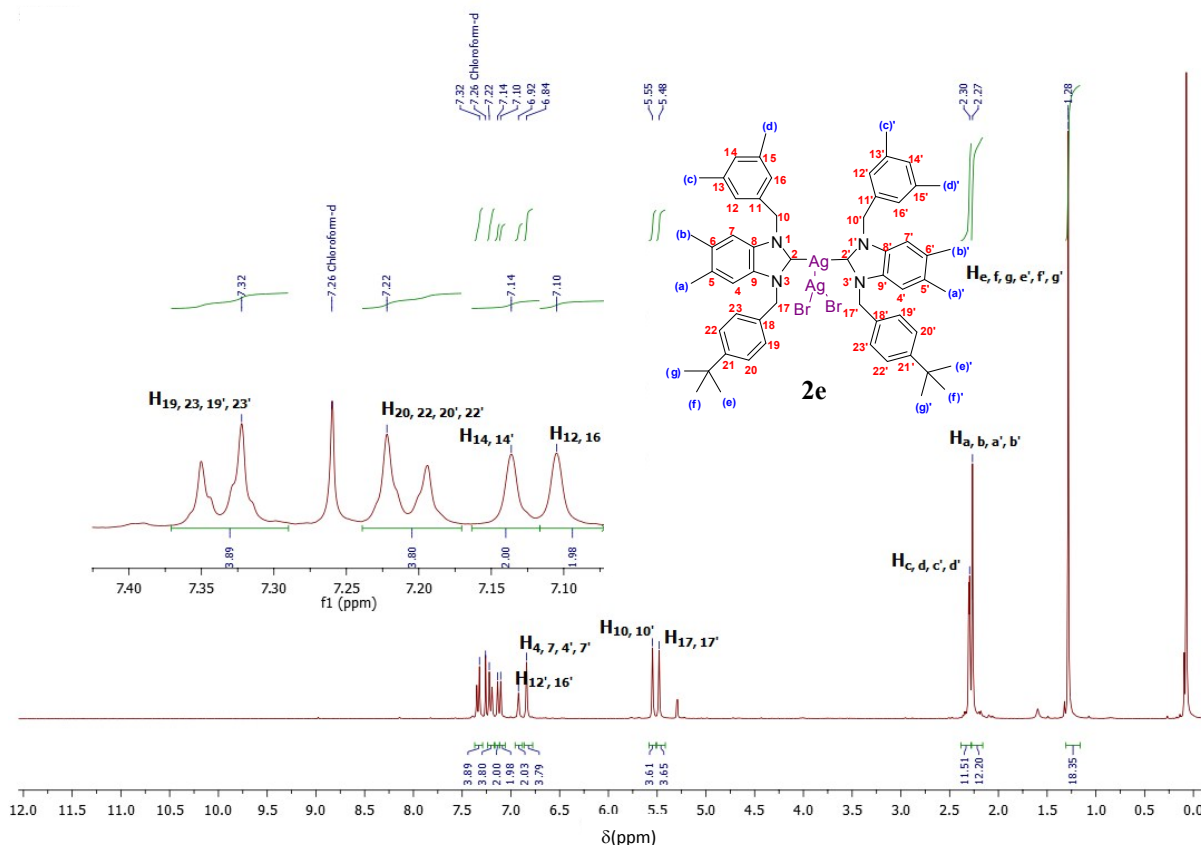

Figure S22: <sup>1</sup>H NMR spectra of Ag(I)-N-Heterocyclic Carbene complexes **2e** (CDCl<sub>3</sub>, 300MHz).

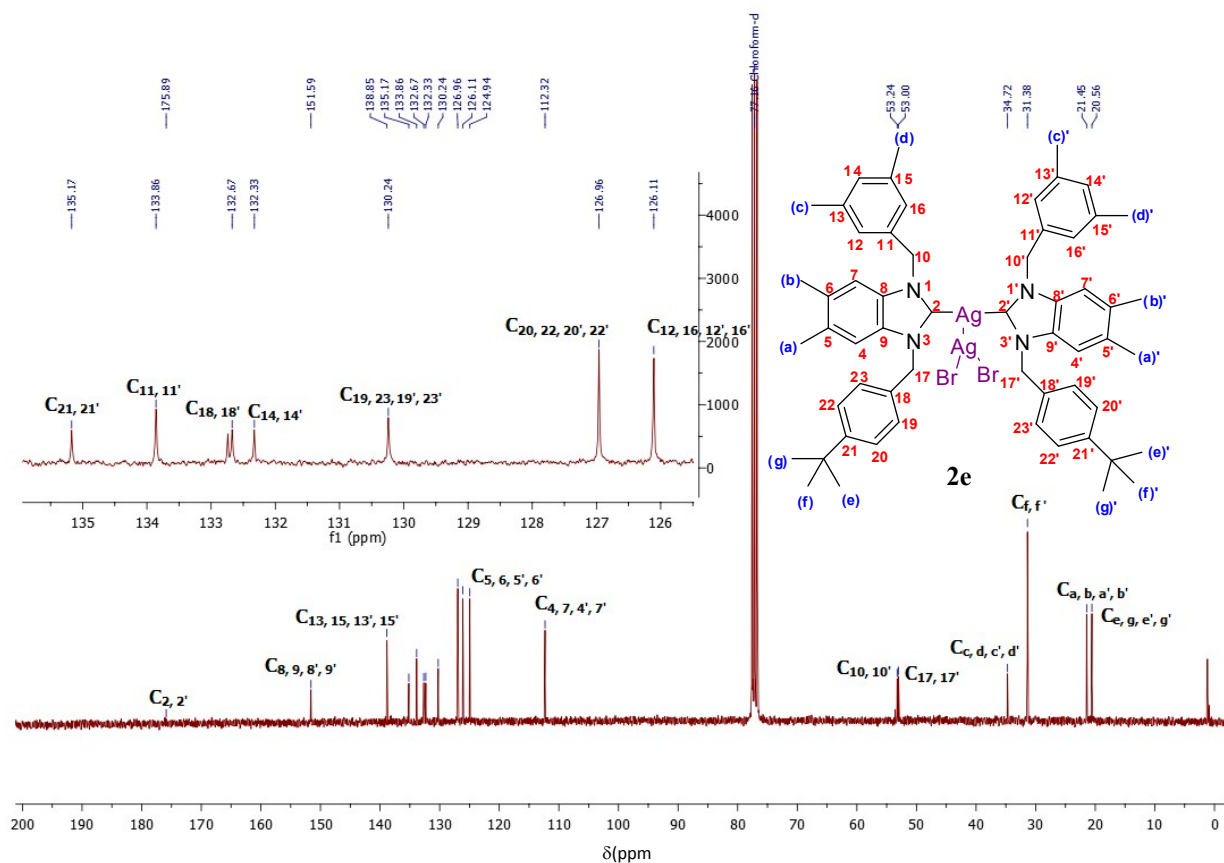

Figure S23:  $^{13}\text{C}$ NMR spectra of Ag(I)-N-Heterocyclic Carbene complexes **2e** ( $\text{CDCl}_3$ , 75MHz).

**Bromo-[1-(3,5-dimethylbenzyl)-3-(4-methylbenzyl) benzimidazole-2-ylidene]silver (I), 2f**

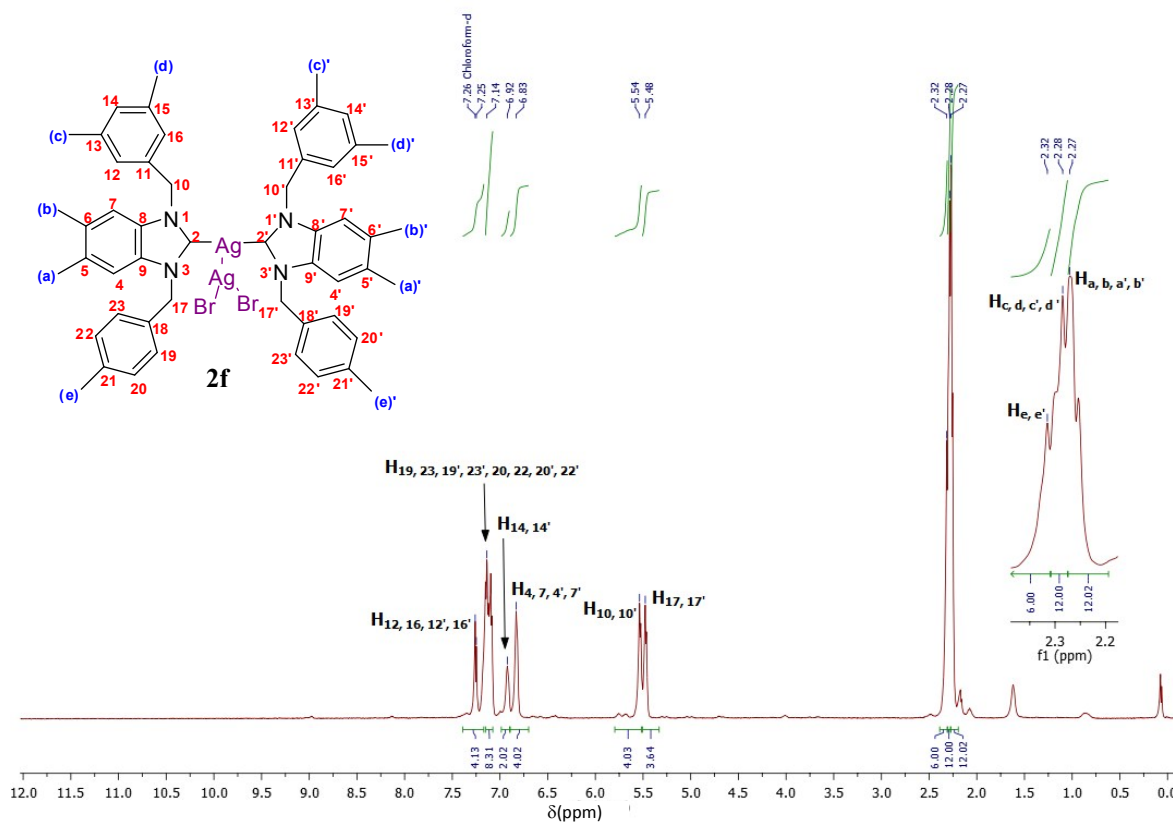

Figure S24:  $^1\text{H}$ NMR spectra of Ag(I)-N-Heterocyclic Carbene complexes **2f** ( $\text{CDCl}_3$ , 300MHz).

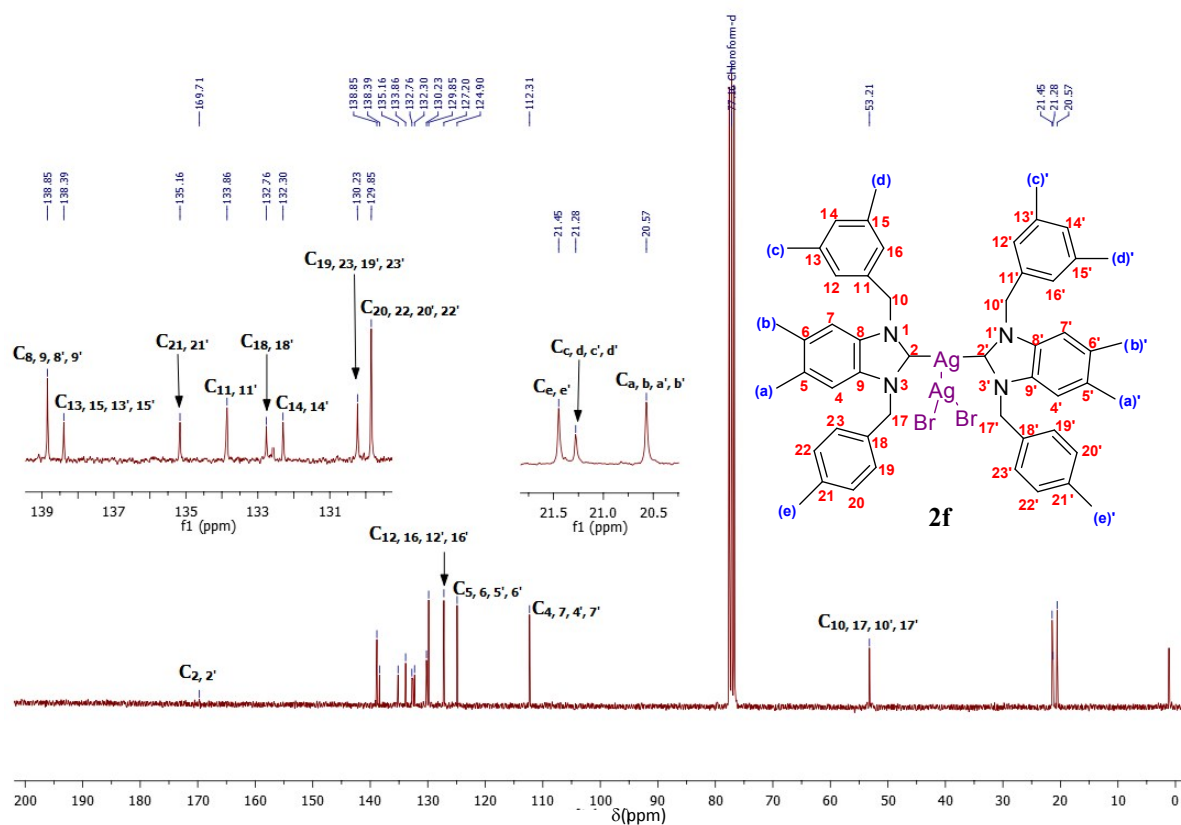

Figure S25:  $^{13}\text{C}$ NMR spectra of Ag(I)-N-Heterocyclic Carbene complexes **2f** ( $\text{CDCl}_3$ , 75MHz).

*Dichloro-[1,3-bis(4-methylbenzyl)benzimidazol-2-ylidene](p-cymene)-ruthenium(II), 3b*

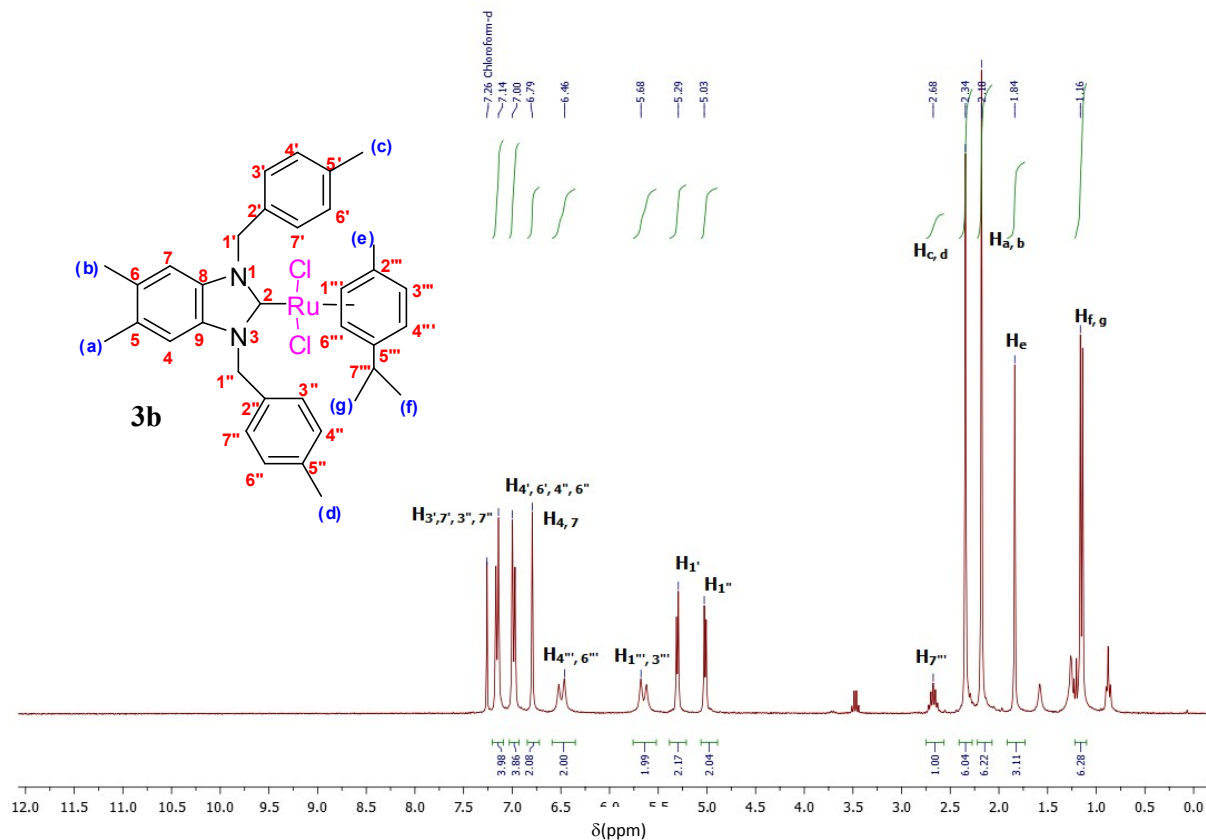

Figure S29:  $^1\text{H}$ NMR spectra of Ru(II)-N-Heterocyclic Carbene complexes **3b** ( $\text{CDCl}_3$ , 300MHz).

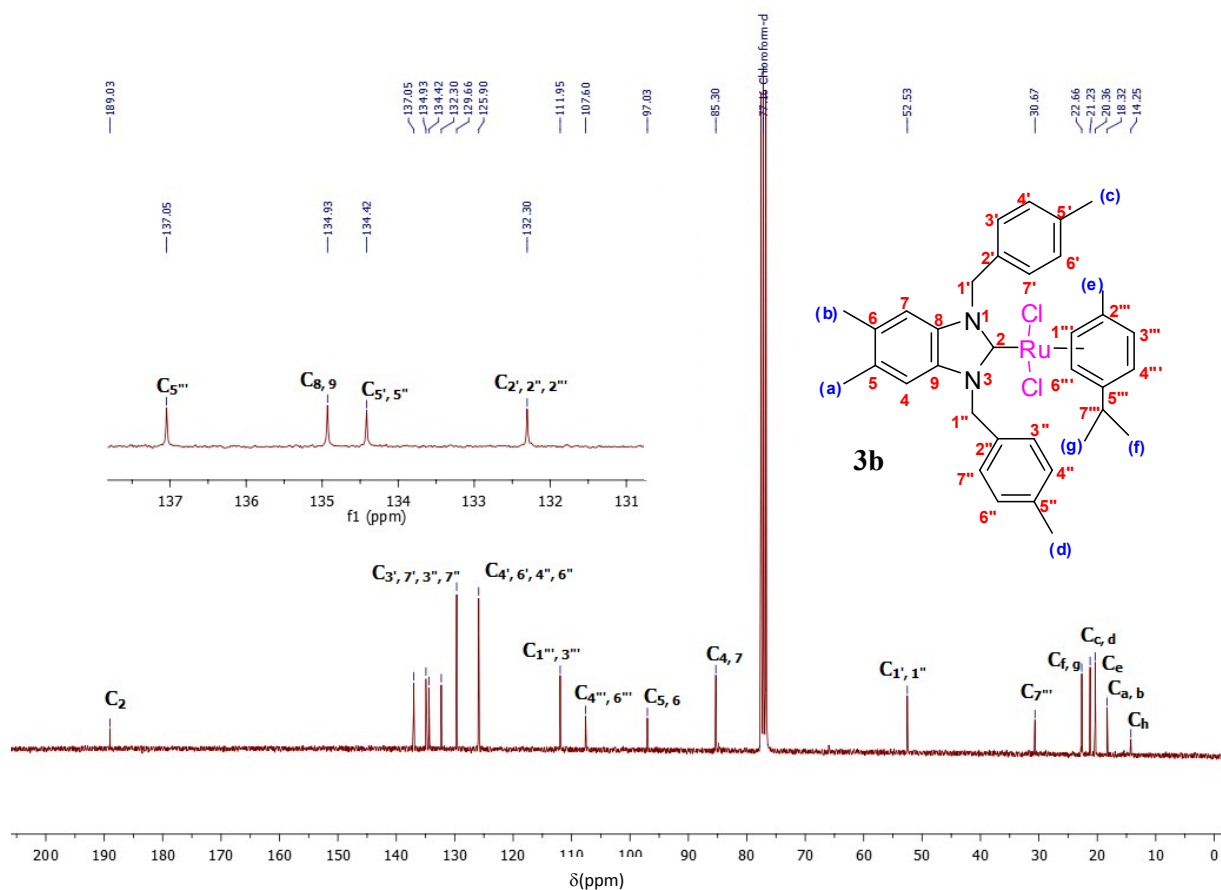

Figure S30:  $^{13}\text{C}$ NMR spectra of Ru(II)-N-Heterocyclic Carbene complexes **3b** ( $\text{CDCl}_3$ , 75MHz).

**Dichloro-[1,3-bis(4-tertbutylbenzyl)benzimidazol-2-ylidene](p-cymene)-ruthenium(II), 3c**

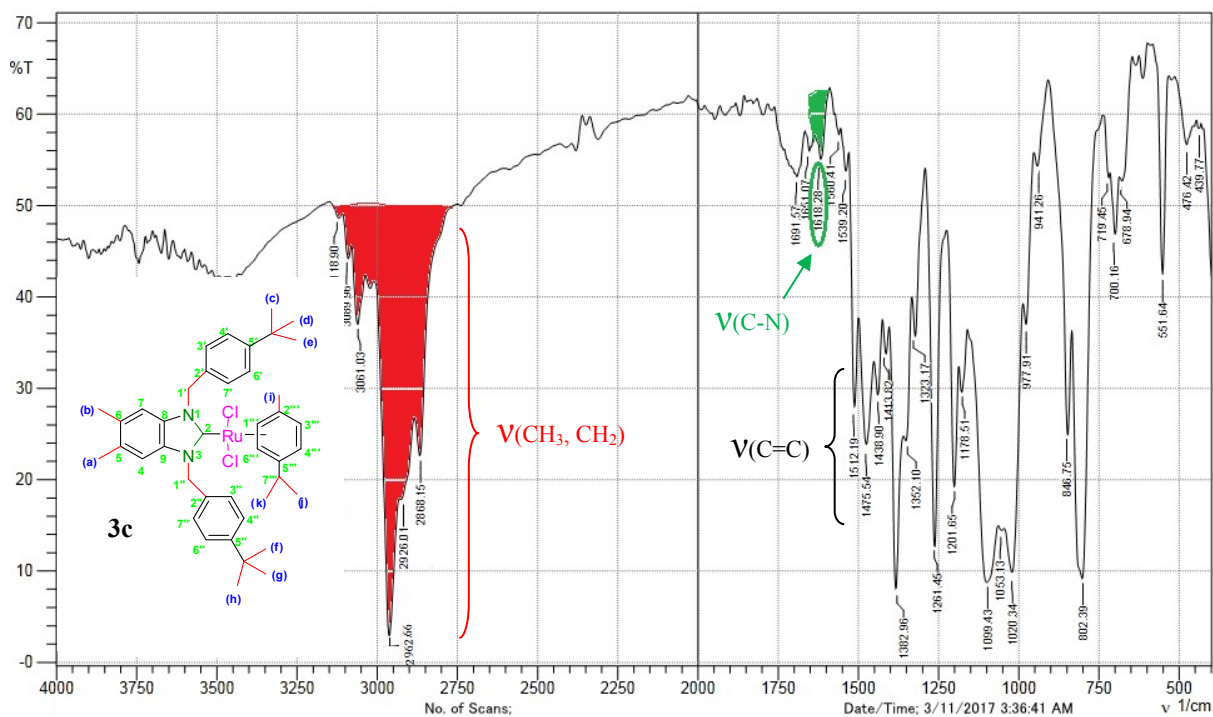

Figure S31: FT-IR spectra of Ru(II)-N-Heterocyclic Carbene complexes **3c**.

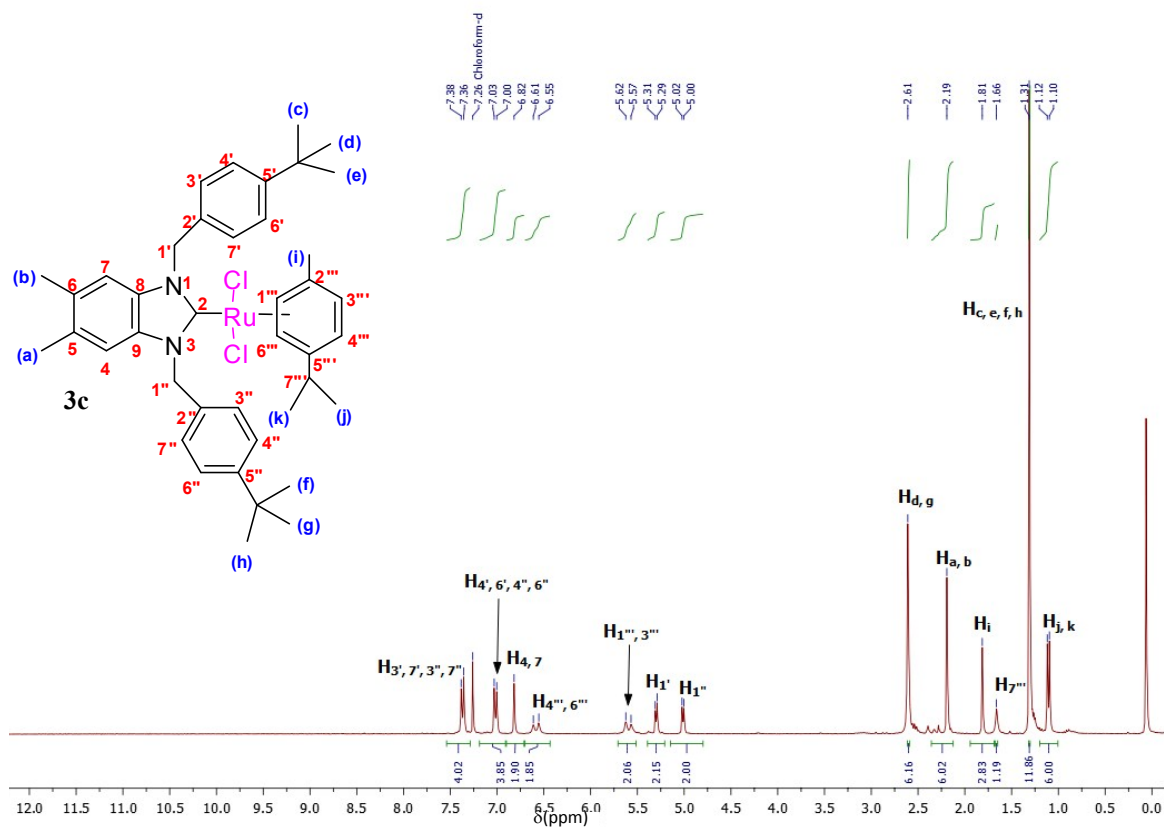

Figure S32: <sup>1</sup>H NMR spectra of Ru(II)-N-Heterocyclic Carbene complexes **3c** (CDCl<sub>3</sub>, 300MHz).

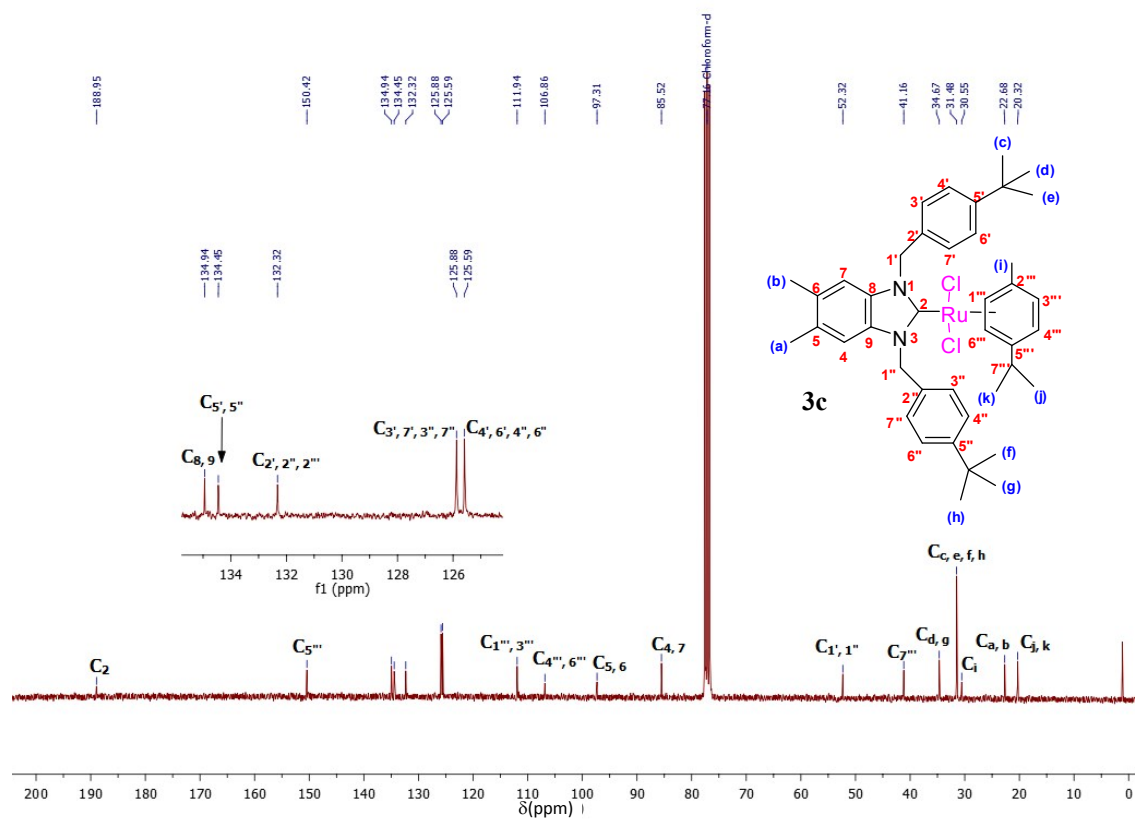

Figure S32: <sup>13</sup>C NMR spectra of Ru(II)-N-Heterocyclic Carbene complexes **3c** (CDCl<sub>3</sub>, 75MHz).



**Dichloro-[1-(3,5-dimethylbenzyl)-3-(2,3,5,6-tetramethylbenzyl)benzimidazol-2-ylidene](p-cymene) ruthenium(II), 3d**

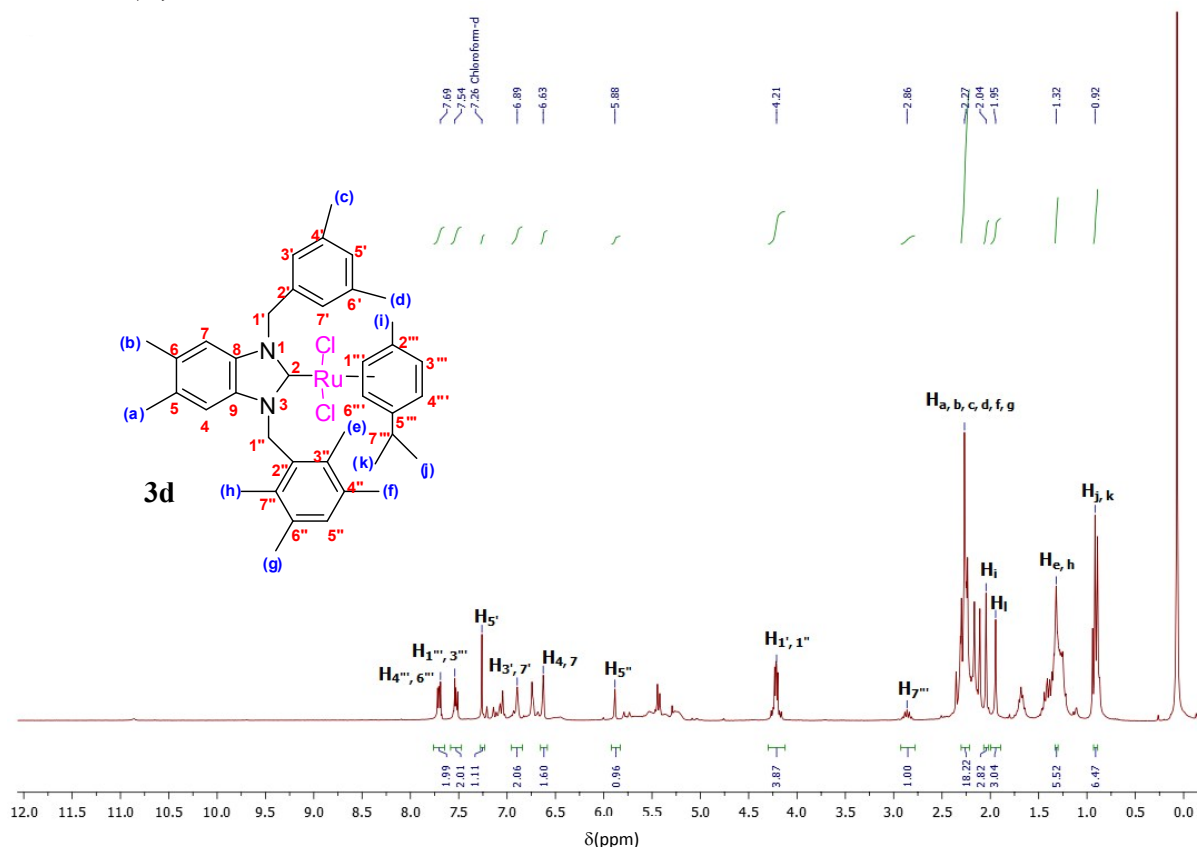

Figure S33: <sup>1</sup>H NMR spectra of Ru(II)-N-Heterocyclic Carbene complexes **3d** (CDCl<sub>3</sub>, 300MHz).

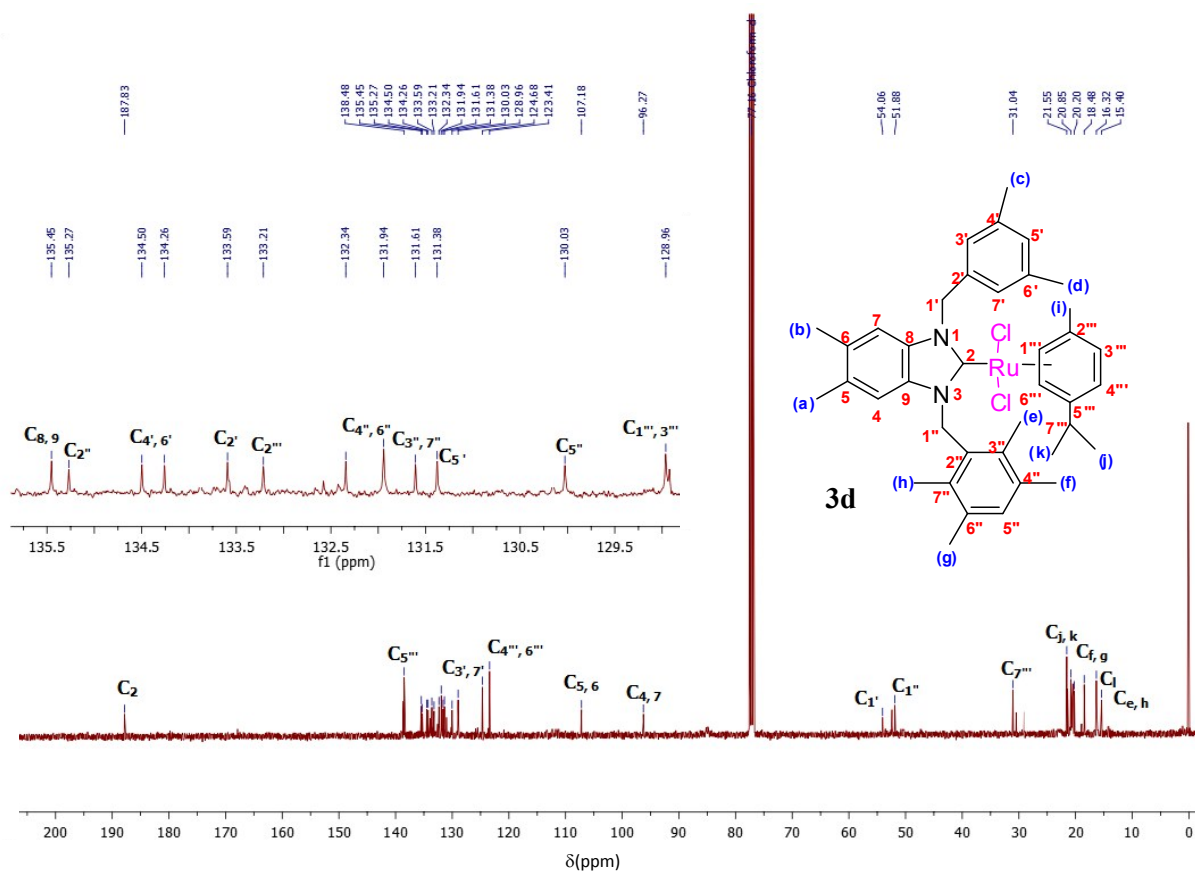



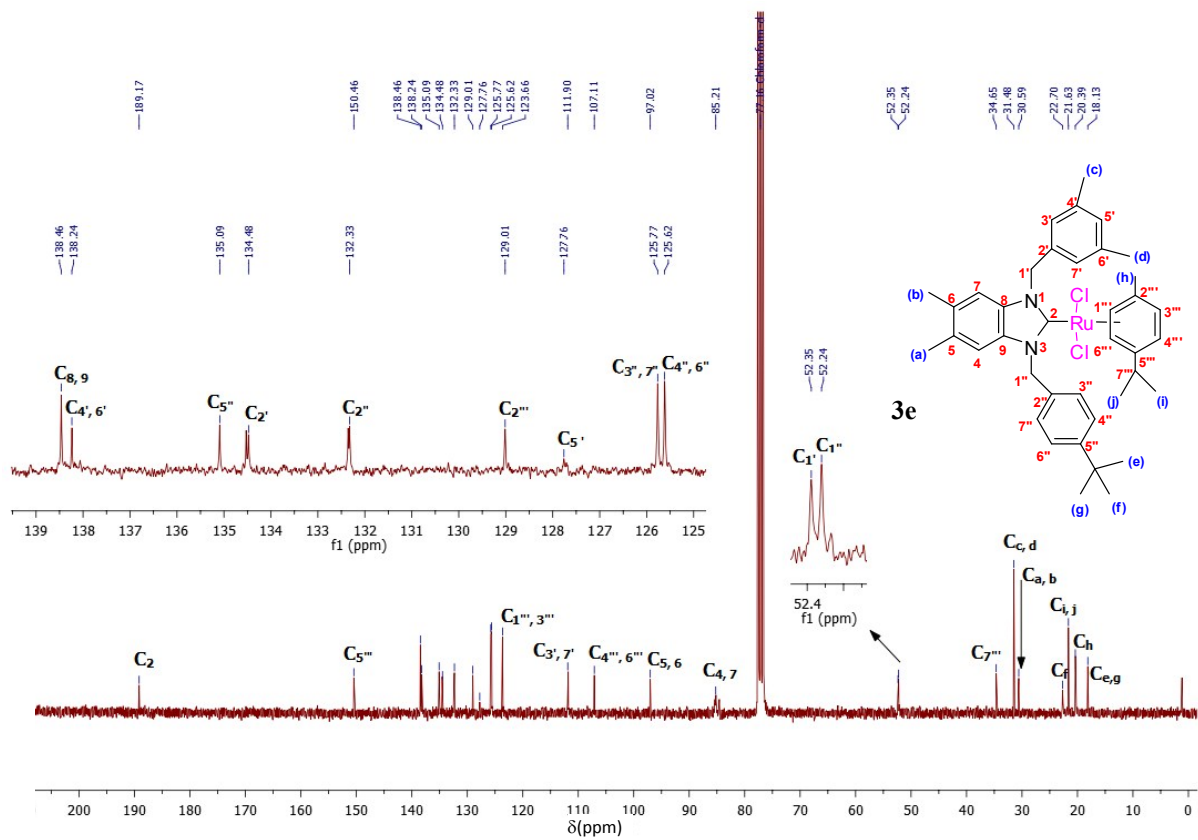

Figure S36:  $^{13}\text{C}$ NMR spectra of Ru(II)-N-Heterocyclic Carbene complexes **3e** ( $\text{CDCl}_3$ , 75MHz).

Dichloro-[1-(3,5-dimethylbenzyl)-3-(4-methylbenzyl)benzimidazol-2-ylidene](*p*-cymene)-ruthenium(II), **3f**

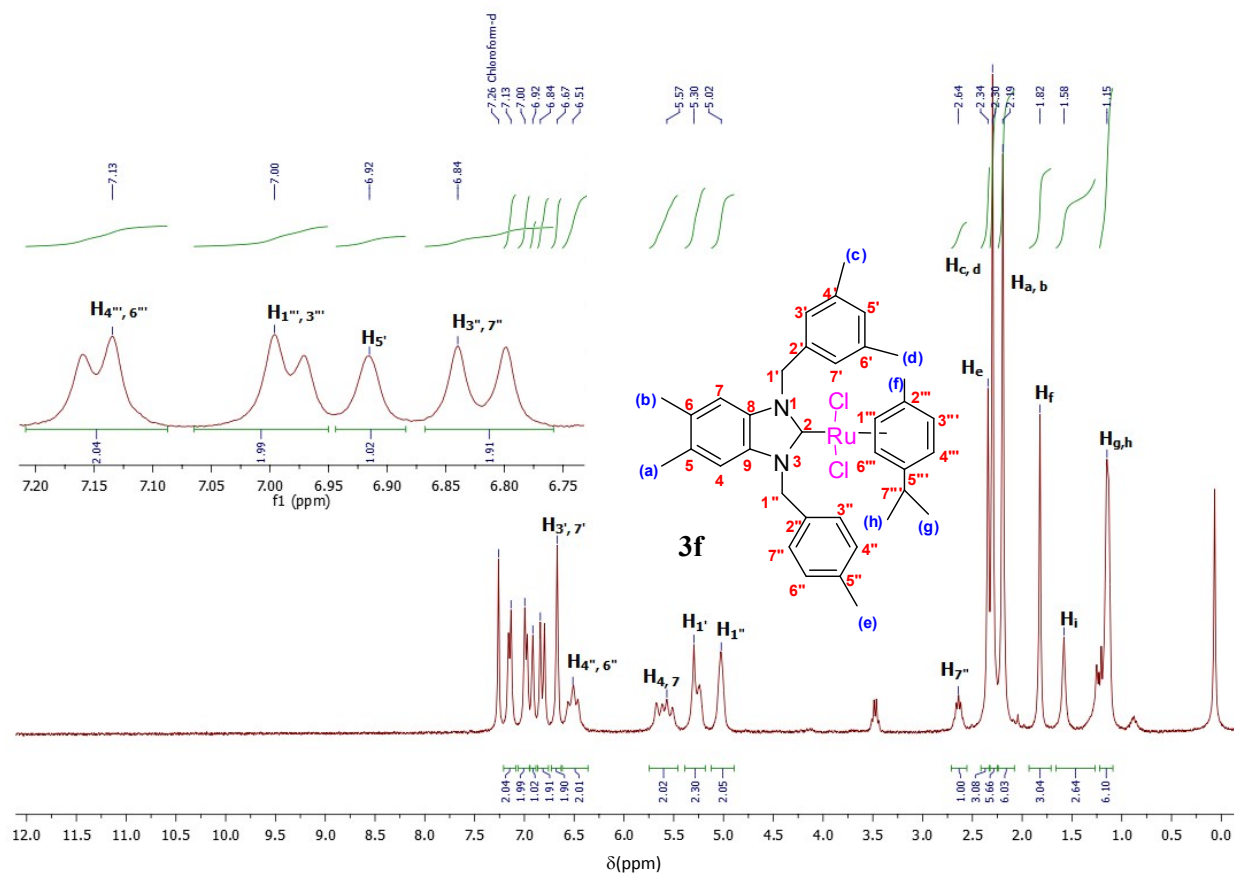

Figure S37:  $^1\text{H NMR}$  spectra of Ru(II)-N-Heterocyclic Carbene complexes **3f** ( $\text{CDCl}_3$ , 300MHz).

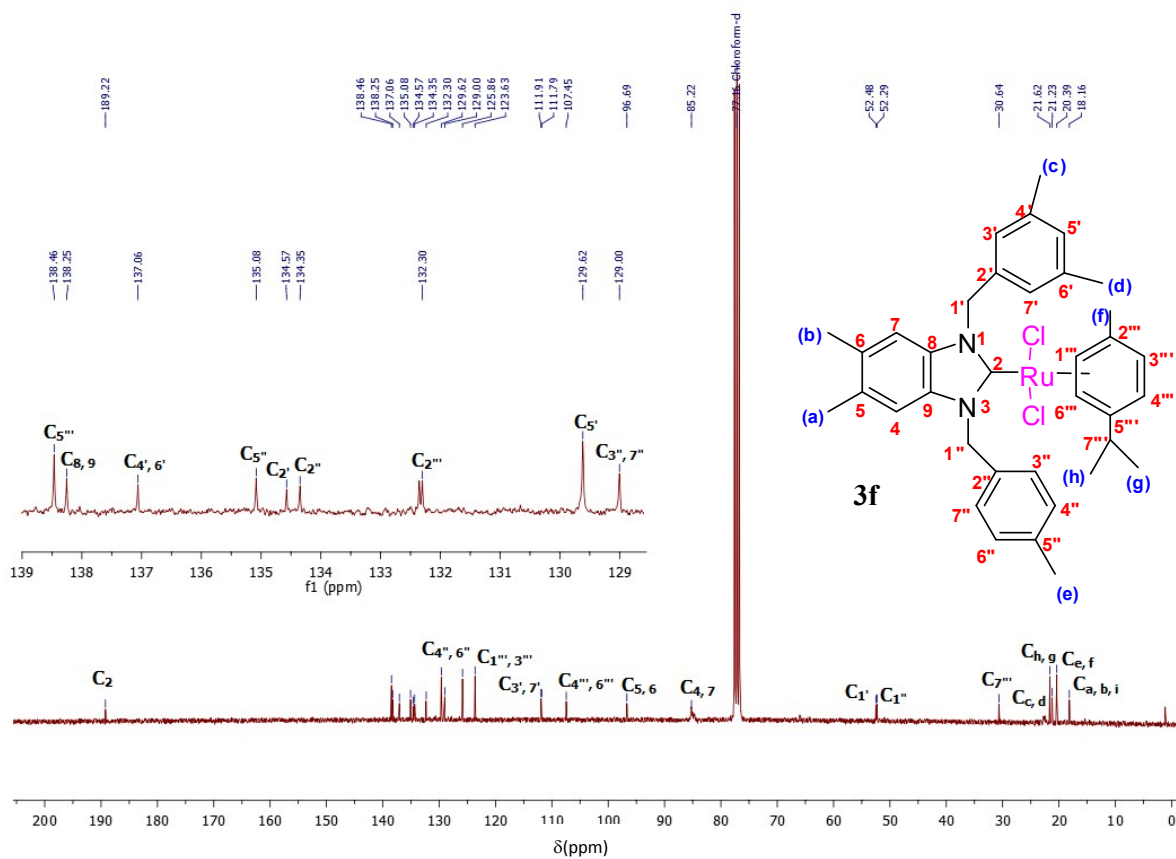

Figure S38:  $^{13}\text{C}$ NMR spectra of Ru(II)-N-Heterocyclic Carbene complexes **3f** ( $\text{CDCl}_3$ , 75MHz).
